# 1 Polygenic enrichment distinguishes disease 2 associations of individual cells in single-cell RNA-seq 3 data

4 **Martin Jinye Zhang**<sup>1,2,\*</sup>, **Kangcheng Hou**<sup>3-5,\*</sup>, **Kushal K. Dey**<sup>1,2</sup>, **Saori Sakaue**<sup>2,6-9</sup>, **Karthik A.**  
5 **Jagadeesh**<sup>1,2</sup>, **Kathryn Weinand**<sup>2,6-9</sup>, **Aris Taychameekiatchai**<sup>10,11</sup>, **Poorvi Rao**<sup>10</sup>, **Angela**  
6 **Oliveira Pisco**<sup>12</sup>, **James Zou**<sup>12-14</sup>, **Bruce Wang**<sup>10</sup>, **Michael Gandal**<sup>15-17</sup>, **Soumya**  
7 **Raychaudhuri**<sup>2,6-9,18</sup>, **Bogdan Pasaniuc**<sup>3-5,†</sup>, and **Alkes L. Price**<sup>1,2,19,†</sup>

8 <sup>1</sup>Department of Epidemiology, Harvard T.H. Chan School of Public Health, Boston, MA, USA

9 <sup>2</sup>Program in Medical and Population Genetics, Broad Institute of MIT and Harvard, Cambridge, MA, USA

10 <sup>3</sup>Bioinformatics Interdepartmental Program, University of California, Los Angeles, Los Angeles, CA, USA

11 <sup>4</sup>Department of Pathology and Laboratory Medicine, David Geffen School of Medicine, University of California, Los  
12 Angeles, Los Angeles, CA, USA

13 <sup>5</sup>Department of Computational Medicine, David Geffen School of Medicine, University of California, Los Angeles,  
14 Los Angeles, CA, USA

15 <sup>6</sup>Center for Data Sciences, Brigham and Women's Hospital, Boston, MA, USA

16 <sup>7</sup>Division of Genetics, Department of Medicine, Brigham and Women's Hospital and Harvard Medical School,  
17 Boston, MA, USA

18 <sup>8</sup>Division of Rheumatology, Inflammation, and Immunity, Department of Medicine, Brigham and Women's Hospital  
19 and Harvard Medical School, Boston, MA, USA

20 <sup>9</sup>Department of Biomedical Informatics, Harvard Medical School, Boston, MA, USA

21 <sup>10</sup>Department of Medicine and Liver Center, University of California San Francisco, San Francisco, CA, USA

22 <sup>11</sup>Developmental and Stem Cell Biology Graduate Program, University of California San Francisco, San Francisco,  
23 CA, USA

24 <sup>12</sup>Chan Zuckerberg Biohub, San Francisco, CA, USA

25 <sup>13</sup>Department of Electrical Engineering, Stanford University, Palo Alto, CA, USA

26 <sup>14</sup>Department of Biomedical Data Science, Stanford University, Palo Alto, CA, USA

27 <sup>15</sup>Department of Psychiatry, David Geffen School of Medicine, University of California, Los Angeles, Los Angeles,  
28 CA, USA

29 <sup>16</sup>Department of Human Genetics, David Geffen School of Medicine, University of California, Los Angeles, Los  
30 Angeles, CA, USA

31 <sup>17</sup>Program in Neurobehavioral Genetics, Semel Institute, David Geffen School of Medicine, University of California,  
32 Los Angeles, Los Angeles, CA, USA

33 <sup>18</sup>Versus Arthritis Centre for Genetics and Genomics, Centre for Musculoskeletal Research, Manchester Academic  
34 Health Science Centre, The University of Manchester, Manchester, UK

35 <sup>19</sup>Department of Biostatistics, Harvard T.H. Chan School of Public Health, Boston, MA, USA

36 \* Equal contribution: M. J. Zhang [jinyezhang@hsph.harvard.edu](mailto:jinyezhang@hsph.harvard.edu), K. Hou [houkc@ucla.edu](mailto:houkc@ucla.edu)

37 † Co-senior authors: A. L. Price [aprice@hsph.harvard.edu](mailto:aprice@hsph.harvard.edu), B. Pasaniuc [pasaniuc@ucla.edu](mailto:pasaniuc@ucla.edu)

## 38 ABSTRACT

Gene expression at the individual cell-level resolution, as quantified by single-cell RNA-sequencing (scRNA-seq), can provide unique insights into the pathology and cellular origin of diseases and complex traits. Here, we introduce single-cell Disease Relevance Score ( $s_{\text{CDRS}}$ ), an approach that links scRNA-seq with polygenic risk of disease at individual cell resolution without the need for annotation of individual cells to cell types;  $s_{\text{CDRS}}$  identifies individual cells that show excess expression levels for genes in a disease-specific gene set constructed from GWAS data. We determined via simulations that  $s_{\text{CDRS}}$  is well-calibrated and powerful in identifying individual cells associated to disease. We applied  $s_{\text{CDRS}}$  to GWAS data from 74 diseases and complex traits (average  $N = 346\text{K}$ ) in conjunction with 16 scRNA-seq data sets spanning 1.3 million cells from 31 tissues and organs. At the cell type level,  $s_{\text{CDRS}}$  broadly recapitulated known links between classical cell types and disease, and also produced novel biologically plausible findings. At the individual cell level,  $s_{\text{CDRS}}$  identified subpopulations of disease-associated cells that are not captured by existing cell type labels, including subpopulations of  $\text{CD4}^+$  T cells associated with inflammatory bowel disease, partially characterized by their effector-like states; subpopulations of hippocampal CA1 pyramidal neurons associated with schizophrenia, partially characterized by their spatial location at the proximal part of the hippocampal CA1 region; and subpopulations of hepatocytes associated with triglyceride levels, partially characterized by their higher ploidy levels. At the gene level, we determined that genes whose expression across individual cells was correlated with the  $s_{\text{CDRS}}$  score (thus reflecting co-expression with GWAS disease genes) were strongly enriched for gold-standard drug target and Mendelian disease genes.

## 40 Introduction

41 The mechanisms through which risk variants identified by genome-wide association studies (GWASs) impact critical tissues and  
42 cell types are largely unknown<sup>1,2</sup>; identifying these tissues and cell types is central to our understanding of disease etiologies  
43 and will inform efforts to develop therapeutic treatments<sup>3</sup>. Single-cell RNA sequencing (scRNA-seq) has emerged as the tool  
44 of choice for measuring gene abundances at single-cell resolution<sup>4,5</sup>, providing an increasingly clear picture of which genes are  
45 active in which cell types and also being able to identify novel cell populations within classically defined cell types. Integrating  
46 scRNA-seq with GWAS data offers the potential to identify critical tissues, cell types, and cell populations through which  
47 GWAS risk variants impact disease<sup>6-8</sup>, thus providing finer resolution than studies using bulk transcriptomic data<sup>9-12</sup>.

48 Previous studies integrating scRNA-seq with GWAS have largely focused on predefined cell type annotations (e.g., classical  
49 cell types defined using known marker genes), aggregating cells from the same cell type followed by evaluating overlap of  
50 the cell type-level information with GWAS<sup>6-8</sup>. However, this approach overlooks the considerable heterogeneity of individual  
51 cells within cell types that has been reported in studies of scRNA-seq data alone<sup>13-18</sup>; the underlying methods (e.g., Seurat  
52 cell-scoring function<sup>15</sup>, Vision<sup>16</sup>, and VAM<sup>18</sup>) have sought to explain transcriptional heterogeneity in scRNA-seq data by  
53 scoring cells based on predefined gene sets such as pathway gene sets, but do not consider polygenic disease risk from GWAS  
54 and generally do not provide individual cell-level association p-values. Integrating information from scRNA-seq data at  
55 fine-grained resolution (e.g., individual cells both within and across cell types) with polygenic signals from disease GWAS has  
56 considerable potential to produce new biological insights.

57 Here, we introduce *single-cell Disease Relevance Score* ( $s_{\text{CDRS}}$ ), a method to evaluate polygenic disease enrichment of  
58 individual cells in scRNA-seq data.  $s_{\text{CDRS}}$  assesses whether a given cell has excess expression levels across a set of putative  
59 disease genes derived from GWAS, using an appropriately matched empirical null distribution to estimate well-calibrated  
60 p-values. To our knowledge,  $s_{\text{CDRS}}$  is the first method to associate individual cells in scRNA-seq data to disease GWAS. We  
61 performed extensive simulations to assess the calibration and power of  $s_{\text{CDRS}}$ . We then applied  $s_{\text{CDRS}}$  to 74 diseases and  
62 complex traits (average GWAS  $N = 346\text{K}$ ) in conjunction with 16 scRNA-seq data sets (including the Tabula Muris Senis  
63 (TMS) mouse cell atlas<sup>19</sup>), assessing cell type-disease associations and within-cell type association heterogeneity, including  
64 heterogeneity of T cells in their association with inflammatory bowel disease (IBD) and other autoimmune diseases, neurons in  
65 their association with schizophrenia (SCZ) and other brain-related diseases/traits, and hepatocytes in their association with  
66 triglyceride levels (TG) and other metabolic traits; we analyzed a broader set of scRNA-seq data sets to provide validation  
67 across species (human vs. mouse) and across sequencing platforms, and to include scRNA-seq data sets with experimentally  
68 determined cell types and cell states.

## 69 Results

### 70 Overview of methods

71  $s_{\text{CDRS}}$  integrates gene expression profiles from scRNA-seq with polygenic disease information from GWAS to associate  
72 individual cells to disease without the need for annotation of individual cells to cell types, by assessing the excess expression  
73 of putative disease genes from GWAS in a given cell relative to other genes with similar expression levels across all cells.

*s*cDRS consists of three steps (Fig. 1, Methods, and Supp. Note). First, *s*cDRS constructs a set of putative disease genes from GWAS summary statistics using MAGMA<sup>20</sup>, an existing gene scoring method (top 1,000 MAGMA genes; see Methods for other choices evaluated). Second, *s*cDRS quantifies the aggregate expression of the putative disease genes in each cell to generate cell-specific *raw disease scores*; to maximize power, each putative disease gene is weighted by its GWAS MAGMA z-score and inversely weighted by its gene-specific technical noise level in the single-cell data, estimated via modeling the mean-variance relationship across genes<sup>18,21</sup> (alternative choices of cell scores are evaluated in Methods). To determine statistical significance, *s*cDRS also generates 1,000 sets of cell-specific *raw control scores* at Monte Carlo (MC) samples of matched control gene sets (matching the gene set size, mean expression, and expression variance of the putative disease genes); cell-specific MC p-values are defined as the proportion of the 1,000 raw control scores for a given cell exceeding the raw disease score for that cell<sup>22</sup>. Third, *s*cDRS approximates the ideal MC p-values (obtained using  $\gg 1,000$  MC samples) by pooling control scores across cells. Specifically, it normalizes the raw disease score and raw control scores for each cell (producing the *normalized disease score* and *normalized control scores*), and then computes cell-level p-values based on the empirical distribution of the pooled normalized control scores across all control gene sets and all cells; this approximation relies on the assumption that the raw control score distributions (across the 1,000 control gene sets, for each cell) are from the same parametric distribution (e.g., normal distributions with different parameters), a reasonable assumption when the disease gene set is neither too small nor too large (e.g.,  $>50$  genes and  $<20\%$  of all genes; Methods). Importantly, *s*cDRS does not use cell type or other cell-level annotations, although these annotations can be of value when interpreting its results. *s*cDRS is computationally efficient and scales linearly with the number of cells and number of control gene sets for both running time and memory (Methods).

*s*cDRS outputs individual cell-level p-values (testing for cell-disease associations as described above), normalized disease scores, and 1,000 sets of normalized control scores (referred to as “disease scores” and “control scores” in the rest of the paper) that can be used for a wide range of downstream applications (Methods). Here, we focus on three downstream analyses. First, we perform *cell type-level* analyses to associate predefined cell types to disease and assess heterogeneity in association to disease across cells within a predefined cell type. Second, we perform *individual cell-level* analyses to associate individual cells to disease and correlate individual cell-level variables to the *s*cDRS disease score. Third, we perform *gene-level* analyses to prioritize disease-relevant genes whose expression is correlated with the *s*cDRS disease score, reflecting co-expression with genes implicated by disease GWAS.

We analyzed publicly available GWAS summary statistics of 74 diseases and complex traits (average  $N=346K$ ; Supp. Table 1) in conjunction with 16 scRNA-seq or single-nucleus RNA-seq (snRNA-seq) data sets spanning 1.3 million cells from 31 tissues and organs from mouse (*mus musculus*) and human (*homo sapiens*) (Supp. Table 2; 15 out of 16 data sets publicly available; Data Availability). The single-cell data sets include two mouse cell atlases from the Tabula Muris Senis (TMS)<sup>19</sup> collected using different technologies (fluorescence-activated cell sorting followed by Smart-seq2 amplification<sup>23</sup> for the TMS FACS data and 10x microfluidic droplet capture and amplification<sup>24</sup> for the TMS droplet data), the unpublished Tabula Sapiens (TS) human cell atlas<sup>25</sup>, and other data sets focusing on specific tissues containing well-annotated cell types and cell states. We focused on the TMS FACS data in our primary analyses due to its comprehensive coverage of 23 tissues and 120 cell types and more accurate quantification of gene expression levels (via Smart-seq2); we used the other 15 data sets to validate our results. We note the extensive use of mouse gene expression data to study human diseases and complex traits (see Bryois et al.<sup>8</sup>, other studies<sup>6,7,9,12,26</sup>, and Discussion).

## 112 Simulations assessing calibration and power

We performed null simulations and causal simulations to assess the calibration and power of *s*cDRS, comparing *s*cDRS to three state-of-art methods for scoring individual cells with respect to a specific gene set: Seurat (cell-scoring function)<sup>15</sup>, Vision<sup>16</sup>, and VAM<sup>18</sup>. To our knowledge, VAM is the only method for scoring individual cells that provides cell-level association p-values; Seurat and Vision provide quantitative cell-level scores that we transformed to p-values based on the standard normal distribution (Methods).

First, we evaluated each method in null simulations in which no cells have systematically higher expression across the putative disease genes analyzed. We subsampled 10,000 cells from the TMS FACS data and randomly selected 1,000 putative disease genes. We simulated GWAS gene weights for *s*cDRS matching the MAGMA z-score distributions in real traits and used binary disease gene sets for the other 3 methods. *s*cDRS and Seurat produced well-calibrated p-values, Vision suffered slightly inflated type I error, and VAM suffered severely inflated type I error (Fig. 2A and Supp. Table 11). The slight miscalibration of Vision may be due to the mismatch between the normal distribution used for computing p-values and the actual null distribution of the cell-level scores. The poor calibration of VAM may be because it uses a permutation-based test that assumes independence between genes under the null, an assumption that is likely to be violated in scRNA-seq data. Secondary analyses are reported in the Supp. Note, including null simulations with other numbers of putative disease genes or biased sets of putative disease genes (e.g., randomly selected from genes with high mean expression) (Supp. Fig. 4,5), and null

128 simulations for  $s_{\text{CDRS}}$  cell type-level association analysis (Supp. Table 12).

129 Next, we evaluated  $s_{\text{CDRS}}$ , Seurat and Vision in causal simulations in which a subset of causal cells has systematically  
130 higher expression across putative disease genes (we did not include VAM, which was not well-calibrated in null simulations).  
131 We used the same 10,000 cells subsampled from the TMS FACS data, randomly selected 1,000 causal disease genes, randomly  
132 selected 500 of the 10,000 cells as causal cells and artificially perturbed their expression levels to be higher (1.05-1.50 times for  
133 different simulations) across the 1,000 causal disease genes, and randomly selected 1,000 putative disease genes (provided as  
134 input to each method) with 25% overlap with the 1,000 causal disease genes. We used the binary gene set for all 3 methods  
135 because there were no GWAS weights involved in generating the data. We determined that  $s_{\text{CDRS}}$  attained higher power than  
136 Seurat and Vision to detect individual cell-disease associations at  $\text{FDR} < 0.1$  (Fig. 2B and Supp. Table 13); the improved power  
137 of  $s_{\text{CDRS}}$  may be due to its incorporation of gene-specific weights that downweight genes with higher levels of technical noise.  
138 Please see secondary analyses in Supp. Note, including simulations with other levels of overlap between the 1,000 causal genes  
139 and 1,000 putative disease genes (Supp. Fig. 6).

## 140 Results across 120 TMS cell types for 74 diseases and complex traits

141 We analyzed GWAS data from 74 diseases and complex traits (average  $N=346\text{K}$ ; Supp. Table 1,8) in conjunction with the  
142 TMS FACS data with 120 cell types (cells from different tissues were combined for a given cell type; Supp. Table 5). We first  
143 report  $s_{\text{CDRS}}$  cell type-level results, aggregated for each cell type from the  $s_{\text{CDRS}}$  individual cell-level results; the individual  
144 cell-level results are discussed in subsequent sections. Results for a representative subset of 19 cell types and 22 diseases/traits  
145 are reported in Fig. 3 (complete results in Supp. Fig. 7 and Supp. Table 14). Within this subset,  $s_{\text{CDRS}}$  identified 80 associated  
146 cell type-disease pairs ( $\text{FDR} < 0.05$ ; squares in Fig. 3) and detected significant within-cell type disease-association heterogeneity  
147 for 43 of these 80 associated cell type-disease pairs ( $\text{FDR} < 0.05$ ; cross symbols in Fig. 3; 273 of 597 across all pairs of the  
148 120 cell types and 74 diseases/traits). We also report the proportion of significantly associated individual cells for each cell  
149 type-disease pair ( $\text{FDR} < 0.1$ , a less stringent threshold as false positive associations of individual cells are less problematic and  
150 we do not focus on the results for any one specific cell; heatmap colors in Fig. 3). We note these associated cell type-disease  
151 pairs (and individual cell-disease associations discussed in subsequent sections) may reflect indirect tagging of causal cell types  
152 rather than direct causal associations, analogous to previous works (see Discussion).

153 For cell type-disease associations, as expected,  $s_{\text{CDRS}}$  broadly associated blood/immune cell types with blood/immune-  
154 related diseases/traits, brain cell types with brain-related diseases/traits, and other cell types with other diseases/traits (block-  
155 diagonal pattern in Fig. 3; exceptions are discussed in Supp. Note).

156 We discuss 3 main findings for the blood/immune-related diseases/traits (upper left block in Fig. 3). First, different  
157 blood/immune cell types were associated with the corresponding blood cell traits, including proerythroblasts with RDW,  
158 classical monocytes with monocyte count, and adaptive immune cells with lymphocyte count. We detected significant  
159 heterogeneity across cells for the proerythroblast-RDW association, which may correspond to erythrocytes at different  
160 differentiation stages<sup>27</sup> (see Supp. Fig. 8). Second, immune cell types were associated with immune diseases, including  
161 dendritic cells,  $\text{CD4}^+ \alpha/\beta$  T cells,  $\text{CD8}^+ \alpha/\beta$  T cells, and/or regulatory T cells with rheumatoid arthritis (RA), multiple  
162 sclerosis (MS), and IBD, consistent with previous findings<sup>12,28</sup>. We detected significant heterogeneity across cells for many of  
163 these cell type-disease associations, consistent with the known diversity within the T cell population (see the T cell subsection  
164 below). Third, granulocyte monocyte progenitors (GMP) were strongly associated with MS, highlighting the role of myeloid  
165 cells in MS<sup>29,30</sup>.

166 We discuss 2 main findings for brain-related diseases/traits (middle block in Fig. 3). First, neuronal cell types, including  
167 medium spiny neurons (MSNs), interneurons, and neurons (neuronal cells with undetermined subtypes), were associated with  
168 schizophrenia (SCZ), major depressive disorder (MDD), bipolar disorder (BP), college education (ECOL), and several other  
169 brain-related traits; the role of MSN in SCZ, MDD, BP, and ECOL is supported by previous genetic studies<sup>8,26,31,32</sup>. We  
170 detected significant heterogeneity across neurons in their association with most brain-related diseases/traits (see the neuron  
171 subsection below). Second, oligodendrocytes, oligodendrocyte precursor cells (OPCs) were also associated with multiple  
172 brain-related diseases/traits. These associations are less clear in existing genetic studies<sup>6,8,26,33</sup>, but are biologically plausible,  
173 consistent with the increasingly discussed role of oligodendrocyte lineage cells in brain diseases/traits: the differentiation and  
174 myelination of oligodendrocyte lineage cells are important to maintain the functionality of neuronal cells<sup>34,35</sup>. We detected  
175 significant heterogeneity across OPCs in their association with many brain-related diseases/traits, consistent with recent  
176 evidence of functionally diverse states of OPCs<sup>36</sup>, traditionally considered to be a homogeneous population (see Supp. Fig. 9).

177 We discuss 2 main findings for other diseases/traits (lower right block in Fig. 3). First, hepatocytes were associated with  
178 several metabolic traits including TG and testosterone (TST) (and other lipid traits; Supp. Fig. 7); hepatocytes are known to  
179 play an important role in metabolism<sup>37</sup>. We detected significant heterogeneity across hepatocytes in their association with TG  
180 and TST (see the hepatocyte subsection below). Second, other cell types, including chondrocytes, bladder cells, ventricular  
181 myocytes and pancreatic beta cells, were associated with their corresponding expected diseases/traits, consistent with previous



182 genetic studies<sup>38–41</sup>.

183 We performed 4 secondary analyses to assess robustness of these results; further details are provided in the Supp. Note.  
184 First, we determined that *sCDRS* cell type-disease associations are highly consistent between data sets collected using different  
185 technologies (TMS FACS vs. TMS droplet) and reasonably consistent between mouse and human data (TMS FACS vs. TS  
186 FACS) (Supp. Fig. 10). Second, we determined that cell type-disease associations are highly consistent between *sCDRS* and 4  
187 existing cell type-level association methods (LDSC-SEG<sup>12</sup> and 3 methods in Bryois et al.<sup>8</sup>; Supp. Fig. 11). Third, since the  
188 *sCDRS* results may be biased towards major cell types with many cells, we implemented a version of *sCDRS* that adjusts for  
189 cell type proportions, and determined that it was highly consistent with the default version (median of 0.97 across 74 diseases  
190 for the *sCDRS* disease score correlation computed across all TMS FACS cells) and well-calibrated in null simulations (Supp.  
191 Fig. 4; Methods). Fourth, we determined that *sCDRS* is robust to different scaling factors for size-factor normalization (median  
192 of 0.90 across 74 diseases for the *sCDRS* disease score correlation between scaling to the default 10,000 vs. 1 million reads per  
193 cell computed across all TMS FACS cells; Methods).

194 We performed 2 secondary analyses to assess alternative versions of *sCDRS*; further details are provided in the Supp. Note.  
195 First, we determined that the default version of *sCDRS* outperformed alternative versions using different disease gene selection  
196 methods (top 100, top 500, top 2,000, FWER<5%, FDR<1%, instead of top 1,000), weighting methods for the selected disease  
197 genes (no weights, GWAS MAGMA z-score weights, single-cell technical noise weights, instead of using both sets of weights),  
198 or MAGMA gene window sizes (0 kb, 50 kb, instead of 10 kb) (Supp. Fig. 12,13, Supp. Table 17,18; Methods). Second,  
199 we determined that the default weighted score (only capturing overexpression of putative disease genes in the relevant cell  
200 population) substantially outperformed an overdispersion score capturing both overexpression and underexpression (Supp. Fig.  
201 14; Methods).

## 202 Heterogeneous subpopulations of T cells associated with autoimmune disease

203 We sought to further understand the heterogeneity across T cells in the TMS FACS data in their association with autoimmune  
204 diseases (Fig. 3). We jointly analyzed all T cells in the TMS FACS data (3,769 cells, spanning 15 tissues). Since the original  
205 study clustered cells from different tissues separately<sup>19</sup>, we reclustered these T cells, resulting in 11 clusters (Fig. 4A; Methods);  
206 we verified that batch effects were not observed for tissue, age, or sex (Supp. Fig. 15). We considered 10 autoimmune  
207 diseases: IBD, Crohn's disease (CD), ulcerative colitis (UC), RA, MS, AIT, hypothyroidism (HT), eczema, asthma (ASM), and  
208 respiratory and ear-nose-throat diseases (RR-ENT) (Supp. Table 1); we also considered height as a negative control trait.

209 We focused on individual cells associated with IBD, a representative autoimmune disease (Fig. 4B; results for HT in  
210 Fig. 4C; results for the other 8 autoimmune diseases and height in Supp. Fig. 16). The 387 IBD-associated cells (FDR<0.1)  
211 formed subpopulations of 4 of the 11 T cell clusters; we characterized these subpopulations based on marker gene expression,  
212 automatic T cell subtype annotation<sup>42</sup>, and overlap of specifically expressed genes in each subpopulation with T cell signature  
213 gene sets (Supp. Fig. 17,18,19,20; Methods). First, the subpopulation of 123 IBD-associated cells in cluster 3 (labeled as  
214 “Treg”) had high expression of regulatory T cell (Treg) marker genes (e.g., *FOXP3*<sup>+</sup>, *CTLA4*<sup>+</sup>, *LAG3*<sup>+</sup>; Supp. Fig. 20A), and  
215 their specifically expressed genes significantly overlapped with Treg signatures ( $P=6.0 \times 10^{-8}$  for MSigDB signatures and  
216  $P=4.0 \times 10^{-68}$  for an effector-like Treg program<sup>43</sup>, Fisher's exact test; Supp. Fig. 20C,D), suggesting these cells had Treg  
217 immunosuppressive functions. Interestingly, these 123 IBD-associated cells were non-randomly distributed in cluster 3 on the  
218 UMAP plot ( $P<0.001$ , MC test; Methods). Genes specifically expressed in these IBD-associated cells were preferentially  
219 enriched (compared to the 506 non-IBD-associated cells in the same cluster) in pathways defined by NF- $\kappa$ B signaling, T helper  
220 cell differentiation, and tumor necrosis factor-mediated signaling (Supp. Fig. 20E); these pathways are closely related to  
221 inflammation, a distinguishing feature of IBD<sup>44</sup>. Second, the 78 IBD-associated cells in cluster 4 had high expression of T  
222 helper 2 (Th2) markers in the lower part of the cluster (e.g., *CCR8*<sup>+</sup>, *IL2*<sup>+</sup>) and Treg markers in the upper part (e.g., *FOXP3*<sup>+</sup>,  
223 *CTLA4*<sup>+</sup>; Supp. Fig. 17,18A-C), suggesting a mixed cluster identity (labeled as “Th2/Treg-like”); the role of Th2 cells in  
224 IBD has been discussed in literature<sup>45</sup>. Third, the 85 IBD-associated cells in cluster 5 (*IL23R*<sup>+</sup> *RORC*<sup>+</sup> *IL17A*<sup>+</sup>; labeled  
225 as “Th17-like”) were characterized as having T helper 17 (Th17) proinflammatory functions. Interestingly, drugs targeting  
226 *IL17A* (secukinumab and ixekizumab) have been considered for treatment of IBD but their use was associated with the onset of  
227 paradoxical effects (disease exacerbation after treatment with a putatively curative drug); the mechanisms underlying these  
228 events are not well understood<sup>46</sup>. Fourth, the 41 IBD-associated cells in cluster 9 (*IFNG*<sup>+</sup> *GZMB*<sup>+</sup> *FASL*<sup>+</sup>; labeled as “CD8<sup>+</sup>  
229 effector-like”) were characterized as having effector CD8<sup>+</sup> (cytotoxic) T cell functions. Overall, these findings are consistent  
230 with previous studies associating subpopulations of effector T cells to IBD, particularly Tregs and Th17 cells<sup>44,47–49</sup>.

231 We further compared the individual T cell associations of IBD to HT, another representative autoimmune disease (Fig.  
232 4C,D; results for comparison of IBD to the other 8 autoimmune diseases are reported in Supp. Fig. 21). The top 4 HT-associated  
233 subpopulations included 3 IBD-associated subpopulations (cells in clusters 3,4,9; Fig. 4C), but also a unique subpopulation of  
234 cells in cluster 10 (labeled as “proliferative”). The association strength was also different between the two diseases. Despite the  
235 stronger associations to HT overall (possibly due to higher GWAS power), IBD was more strongly associated with cells in cluster

4 (labeled as “Th2/Treg-like”; Fig. 4D). Across the 10 autoimmune diseases, pairwise  $s_{\text{CDRS}}$  disease score correlations (across all TMS FACS cells) were moderate (average of 0.51), implying differences between these diseases; the score correlations were not entirely driven by gene set overlap (average overlap of 231/1,000 genes; average  $s_{\text{CDRS}}$  disease score correlation of 0.16 when restricting to non-overlapping genes, substantially higher than the average of -0.10 across traits in different categories; Supp. Fig. 22, Supp. Table 19). Furthermore, the 10 autoimmune diseases formed 3 clusters based on hierarchical clustering of  $s_{\text{CDRS}}$  disease score correlations: IBD-related (IBD, UC, CD), allergy-related (Eczema, ASM, RR-ENT), and others (MS, RA, AIT, HT) (Supp. Fig. 22); these 3 groups represent biologically more similar subtypes of autoimmune diseases<sup>50</sup>, suggesting that  $s_{\text{CDRS}}$  can differentiate between subgroups of diseases from the same category.

We investigated whether the heterogeneity of T cells in association with autoimmune diseases was correlated with T cell effectorness gradient, a continuous classification of T cells defined by naive T cells on one side (immunologically naive T cells matured from the thymus) and effector T cells on the other (differentiated from naive T cells upon activation and capable of mediating effector immune responses); we hypothesized that such a correlation might exist given the effector-like T cell subpopulations associated to IBD above. Following a recent study<sup>51</sup>, we separately computed the effectorness gradients for CD4<sup>+</sup> T cells (1,686 cells) and CD8<sup>+</sup> T cells (2,197 cells) using pseudotime analysis<sup>52</sup> (Supp. Fig. 23A,B; Methods), and confirmed that the inferred effectorness gradients were significantly negatively correlated with naive T cell signatures and positively correlated with memory and effector T cell signatures (Supp. Fig. 23C,D; Methods). We assessed whether the CD4 (resp., CD8) effectorness gradient was correlated with  $s_{\text{CDRS}}$  disease scores for IBD or other autoimmune diseases, across CD4<sup>+</sup> T cells (resp., CD8<sup>+</sup> T cells). Results are reported in Fig. 4E and Supp. Table 20. We determined that the CD4 effectorness gradient was strongly associated with IBD, CD, UC, AIT, and HT ( $P < 0.005$ , MC test; 15%-28% of variance in  $s_{\text{CDRS}}$  disease score explained by CD4 effectorness gradient), weakly associated with Eczema and ASM ( $P < 0.05$ ; 6%-9% variance explained), but not significantly associated with RA, MS, or RR-ENT. This implies that these autoimmune diseases are associated with more effector-like CD4<sup>+</sup> T cells. We also determined that the CD8 effectorness gradient was weakly associated with IBD, CD, and AIT ( $P < 0.05$ , MC test; 6%-9% variance explained), but not significantly associated with the other autoimmune diseases, suggesting that CD4<sup>+</sup> effector T cells may be more important than CD8<sup>+</sup> effector T cells for these diseases. Notably, after conditioning on the 11 cluster labels, the associations with CD4 effectorness gradient remained significant for IBD and CD ( $P < 0.005$ , MC test), AIT and HT ( $P < 0.05$ ), and the associations with CD8 effectorness gradient remained significant for IBD and CD ( $P < 0.05$ ), indicating that  $s_{\text{CDRS}}$  distinguishes effectorness gradients within clusters. In addition, as a negative control, height was not significantly associated in any of these analyses. The association of T cell effectorness gradients with autoimmune diseases has not previously been formally evaluated, but is consistent with previous studies linking T cell effector functions to autoimmune disease<sup>53,54</sup>; the results also suggest that different subpopulations of effector T cells share certain similarities in their association with autoimmune diseases, consistent with previous studies characterizing the similarities among different subtypes of effector T cells, such as an increase in the expression of cytokines and chemokines<sup>51,55,56</sup>.

Finally, we prioritized disease-relevant genes by computing the correlation (across all TMS FACS cells) between the expression of a given gene and the  $s_{\text{CDRS}}$  score for a given disease; this approach identifies genes that are co-expressed with genes implicated by disease GWAS. We compared the top 1,000 genes prioritized using this approach with gold-standard disease-relevant genes based on putative drug targets from Open Targets<sup>57</sup> (phase 1 or above; 8 gene sets with 27-250 genes; used for 8 autoimmune diseases except RR-ENT and HT; Supp. Table 21) or genes known to cause a Mendelian form of the disease<sup>58</sup> (550 genes corresponding to “immune dysregulation”, used for RR-ENT and HT; Supp. Table 21). Results are reported in Fig. 4F and Supp. Table 22. We determined that  $s_{\text{CDRS}}$  attained a more accurate prioritization of disease-relevant genes compared to the top 1,000 MAGMA genes (median ratio of (excess overlap - 1) was 2.07, median ratio of  $-\log_{10}$  p-value was 2.86; Methods), likely by capturing disease-relevant genes with weak GWAS signal<sup>59</sup>. For example, *ITGB7* was prioritized by  $s_{\text{CDRS}}$  for association with IBD (rank 11) but was missed by MAGMA (rank 10565, MAGMA  $P = 0.54$ ); *ITGB7* impacts IBD via controlling lymphocyte homing to the gut and is a drug target for IBD (using vedolizumab)<sup>60,61</sup>. In addition, *JAK1* was prioritized by  $s_{\text{CDRS}}$  for association with RA (rank 358) but was missed by MAGMA (rank 5228, MAGMA  $P = 0.26$ ); *JAK1* plays a role in regulating immune cell activation and is a drug target for RA (using tofacitinib, baricitinib, or upadacitinib)<sup>62,63</sup>.

Additional secondary analyses are reported in the in Supp. Note, including replication results in 2 human scRNA-seq data sets<sup>51,64</sup> (Supp. Table 23), comparison to cluster-level LDSC-SEG analysis (Supp. Fig. 24), and additional results on prioritization of disease-relevant genes (Supp. Fig. 25, Supp. Table 21).

## Heterogeneous subpopulations of neurons associated with brain-related diseases and traits

We sought to further understand the heterogeneity across neurons (in the non-myeloid brain tissue) in the TMS FACS data (484 cells labeled as “neuron”) in association with brain-related diseases and traits (Fig. 3). We considered 7 brain-related diseases and traits: SCZ, MDD, BP, neuroticism (NRT), ECOL, BMI, Smoking (Supp. Table 1); we also considered height as a

negative control trait. While these traits were broadly associated with neurons, pairwise *s*cDRS disease score correlations were moderate across all TMS FACS cells (average of 0.44; Supp. Fig. 22, Supp. Table 19); there were also notable differences in associated brain cell populations, e.g., oligodendrocytes produced stronger associations for SCZ than for Smoking (Supp. Fig. 26). The TMS FACS data includes a partition of neurons into four brain subtissues (cerebellum, cortex, hippocampus, and striatum), but significant heterogeneity remained when we stratified our heterogeneity analyses by subtissue (Supp. Fig. 27).

Since the TMS FACS data has limited coverage of neuronal subtypes, we focused our subsequent analyses on a separate mouse brain scRNA-seq data set (Zeisel & Muñoz-Manchado et al.<sup>65</sup>; 3,005 cells), which has better coverage of neuronal subtypes and has been analyzed at cell type level in several previous genetic studies<sup>8,26,66</sup>. We first investigated cell type-trait associations using *s*cDRS, which associated several neuronal subtypes (CA1 pyramidal neurons, SS pyramidal neurons, and interneurons) with the 7 brain-related traits (Supp. Fig. 28A, Supp. Table 24), consistent with previous genetic studies<sup>8,26,66</sup>. We focused on the CA1 pyramidal neurons from the hippocampus (827 cells), which exhibited the strongest within-cell type heterogeneity (FDR<0.005 for all 7 brain traits, MC test; Supp. Table 24). Individual cell-trait associations for SCZ are reported in Fig. 5A (results for all 7 brain-related traits in Supp. Fig. 28B). We observed a continuous gradient of CA1 pyramidal neuron-SCZ associations, with similar results for other traits.

We investigated whether the heterogeneity observed in Fig. 5A was correlated with spatial location; we hypothesized that such a correlation might exist because of the known location-specific functions of hippocampal neurons<sup>17,67</sup>. We inferred spatial coordinates of the CA1 pyramidal neurons along the natural CA1 spatial axes<sup>68</sup> (dorsal-ventral long axis, proximal-distal transverse axis, and superficial-deep radial axis) for each cell in terms of continuous individual cell-level scores for these 6 spatial regions by applying *s*cDRS to published spatial signature gene sets (instead of MAGMA putative disease gene sets; Supp. Fig. 28C, Supp. Table 10; Methods). We verified that this procedure produced spatial scores significantly correlated with annotated spatial coordinates in independent mouse and human data sets<sup>69,70</sup> (Supp. Fig. 29). The inferred spatial scores for the long (dorsal, ventral) and transverse (proximal, distal) axes varied along the top two UMAP axes, providing visual evidence of stronger neuron-SCZ associations in dorsal and proximal regions (Fig. 5A, Supp. Fig. 28).

We used the results of *s*cDRS for individual cells to assess whether the inferred spatial scores for each of the 6 spatial regions (dorsal/ventral/proximal/distal/superficial/deep) were correlated to the *s*cDRS disease scores for each of the 7 brain-related traits (and height, a negative control trait) across CA1 pyramidal neurons (Methods). Results are reported in Fig. 5B (for the proximal region, which had the strongest associations), Supp. Fig. 30, and Supp. Table 25. We determined that the proximal score was strongly associated with all 7 brain-related traits (all  $P < 0.002$ , MC test; 15%-29% of *s*cDRS disease score variance explained by proximal score;  $P = 0.006$  for height), suggesting proximal CA1 pyramidal neurons may be more relevant to these brain-related traits (instead of distal CA1 pyramidal neurons). The association between the proximal region and brain-related traits is consistent with the fact that the proximal region of the hippocampus receives synaptic inputs in the perforant pathway, which is the main input source of the hippocampus<sup>71,72</sup>.

We reapplied *s*cDRS to 3 additional mouse single-cell data sets<sup>69,73,74</sup> and 3 human single-cell data sets<sup>70,75,76</sup> (Supp. Table 2), computing both spatial scores and disease scores for each cell as above. Results are reported in Supp. Fig. 30. We determined that the proximal score was consistently associated with the 7 brain-related traits across these 7 data sets (while the distal score was consistently non-associated). For the long (dorsal-ventral) and radial (superficial-deep) axes, while the dorsal and deep scores were consistently associated with the 7 brain-related traits across the 7 data sets, the corresponding ventral and superficial scores were consistently associated across the 3 human data sets but consistently non-associated across the 4 mouse data sets, possibly due to differences in brain biology between human and mouse<sup>67,77</sup>.

## Heterogeneous subpopulations of hepatocytes associated with metabolic traits

We sought to further understand the heterogeneity across hepatocytes (in the liver) in the TMS FACS data in their association with metabolic traits (Fig. 3). Since the original study clustered all cells from the liver together<sup>19</sup> (limiting the resolution for distinguishing cell states within hepatocytes), we reclustered the hepatocytes alone, resulting in 6 clusters (1,102 cells; Fig. 5C; Methods). We considered 9 metabolic traits: TG, high-density lipoprotein (HDL), low-density lipoprotein (LDL), total cholesterol (TC), TST, alanine aminotransferase (ALT), alkaline phosphatase (ALP), sex hormone-binding globulin (SHBG), and total bilirubin (TBIL) (Supp. Table 1); we also considered height as a negative control trait.

We focused on individual cells associated with TG, a representative metabolic trait (Fig. 5C; results for the other 8 metabolic traits and height in Supp. Fig. 31). The 530 TG-associated cells (FDR<0.1) formed subpopulations of 5 of the 6 hepatocyte clusters; we characterized these subpopulations based on ploidy level (number of sets of chromosomes in a cell) and zonation (pericentral/mid-lobule/periportal spatial location in the liver lobule), which have been extensively investigated in previous studies of hepatocyte heterogeneity<sup>78-80</sup>. We inferred the ploidy level and zonation for each individual cell in terms of a polyploidy score, a pericentral score, and a periportal score by applying *s*cDRS to published polyploidy/zonation signature gene sets<sup>81-83</sup> (instead of MAGMA putative disease gene sets; Supp. Fig. 32; Methods); we validated these inferred scores using expression signatures and independent data sets with experimentally determined annotations of ploidy level<sup>82</sup> and zonation<sup>83</sup>



(Supp. Note). The inferred ploidy level and zonation varied across clusters, providing visual evidence of stronger cell-TG associations in high-ploidy clusters (clusters 1,2), particularly the periportal high-ploidy cluster (cluster 2; Fig. 5C). We further compared the associations between the 9 metabolic traits. While these traits were broadly associated with hepatocytes, pairwise *s*cDRS disease score correlations were moderate across all TMS FACS cells (average of 0.36; Supp. Fig. 22, Supp. Table 19); however, there were no notable differences in the associated hepatocyte subpopulations across traits (Supp. Fig. 33).

We used the results of *s*cDRS for individual cells to assess whether the inferred ploidy, pericentral and periportal scores were correlated to the *s*cDRS disease score for each of the 9 metabolic traits (and height, a negative control trait) across hepatocytes; we jointly regressed the *s*cDRS disease score for each trait on the ploidy score, pericentral score, and periportal score (because the ploidy score was positively correlated with the other 2 scores; Methods). Results are reported in Fig. 5D (for the ploidy score which had the strongest associations), Supp. Fig. 34 and Supp. Table 26. The ploidy, pericentral, and periportal scores jointly explained 42%-62% of variance of the *s*cDRS disease scores across the 9 metabolic traits. We determined that the ploidy score was strongly associated with all 9 metabolic traits (all  $P < 0.005$  except  $P = 0.006$  for HDL and  $P = 0.007$  for LDL, MC test;  $P = 0.63$  for height), suggesting that high-ploidy hepatocytes may be more relevant to these metabolic traits. The association between ploidy level and metabolic traits is consistent with previous findings that ploidy levels are associated with changes in the expression level of genes for metabolic processes such as de novo lipid biosynthesis and glycolysis<sup>80,81</sup>, and supports the hypothesis that liver functions are enhanced in polyploid hepatocytes<sup>80</sup>. In addition, the periportal score was associated with the 9 metabolic traits ( $P < 0.005$  for TC, TST, ALP, MC test; all  $P < 0.05$  except  $P = 0.24$  for TBIL;  $P = 0.24$  for height). While the pericentral score was not significantly associated with these traits in the TMS FACS data, we detected significant associations across multiple other data sets (see below). These results suggest that these metabolic traits are impacted by complex processes involving both pericentral and periportal hepatocytes.

The association between hepatocyte ploidy level and metabolic traits may imply that there are metabolic trait GWAS variants associated with ploidy (ploidyQTL). This is supported by the excess overlap between the metabolic trait GWAS gene sets and a ploidy signature gene set<sup>81</sup>, but is difficult to assess directly as genetic studies of ploidy level have largely focused on organisms other than humans<sup>84</sup>. Further details are provided in the Supp. Note, including results on 5 additional mouse and human data sets<sup>19,82,83,85,86</sup> and validation of the ploidy score using independent signature gene sets<sup>81</sup> (Supp. Fig. 34 and Supp. Table 27).

## Discussion

We have introduced *s*cDRS, a method that leverages polygenic GWAS signals to associate individual cells in scRNA-seq data with diseases and complex traits; we showed via extensive simulations that *s*cDRS is well-calibrated and powerful. We applied *s*cDRS to 74 diseases and complex traits in conjunction with 16 scRNA-seq data sets and detected extensive heterogeneity in disease associations of individual cells within classical cell types, including subpopulations of T cells associated with IBD partially characterized by their effector-like states, subpopulations of neurons associated with SCZ partially characterized by their spatial location, and subpopulations of hepatocytes associated with TG partially characterized by their higher ploidy levels. These findings have improved our understanding of these diseases/traits, and may prove useful for targeting the relevant cell populations for in vitro experiments to elucidate the molecular mechanisms through which GWAS risk variants impact disease. To ensure a reasonable number of *s*cDRS discoveries, we recommend using GWAS data with a heritability z-score greater than 5, or sample size greater than 100K if heritability z-score is not available (although less stringent thresholds can be used for less polygenic traits) (Supp. Fig. 35). We also recommend using single-cell RNA-seq data with a diverse set of cells potentially relevant to disease, although a smaller number of cells should not affect the *s*cDRS power. However, *s*cDRS will not produce false positives for less ideal GWAS or single-cell data sets.

*s*cDRS does not rely on annotations of classical cell types based on known marker genes, a standard approach for integrating GWAS with scRNA-seq data<sup>6-8</sup> (and bulk gene expression data<sup>9-12</sup>; see Supp. Note), because the *s*cDRS analysis uses the gene expression levels measured in individual cells. Thus, *s*cDRS is particularly well-suited for analyzing data sets that are less well-annotated (e.g., large-scale cell atlases<sup>19,25</sup>) or contain less well-studied cell populations. In addition, *s*cDRS characterizes heterogeneity across individual cells in their associations to common diseases and complex traits, providing a unique perspective relative to studies of single-cell transcriptional heterogeneity focusing on scRNA-seq data alone<sup>13-16, 18, 87, 88</sup>; it also improves upon recent methods for scoring individual cells with respect to a given gene set (e.g., Seurat<sup>15</sup>, Vision<sup>16</sup>, and VAM<sup>18</sup>) by providing robust individual cell-level association p-values and higher detection power (see Supp. Note).

We have demonstrated the value of *s*cDRS in associating individual cells to disease; assessing the heterogeneity across individual cells within predefined cell types in their association to disease; identifying cell-level variables partially characterizing the individual cells that are associated to disease; and broadly associating predefined cell types to disease. We anticipate that application of *s*cDRS to future scRNA-seq/snRNA-seq and GWAS data sets will continue to further these goals.

We note several limitations and future directions of our work. First, identifying a statistical correlation between individual cells (or cell types) and disease does not imply causality, but may instead reflect indirect tagging of causal cells/cell types,



398 analogous to previous work<sup>6,7,12,20</sup>. However, even in such cases, the implicated cells/cell types are likely to be closely  
399 biologically related to the causal cells/cell types, based on their similar expression patterns. Second, we identified putative  
400 disease genes using MAGMA, a widely used method<sup>20</sup>. However,  $s_{cDRS}$  can be applied to any disease gene sets and gene  
401 weights, and it may be possible to construct more accurate sets of disease genes by incorporating other types of data, such as  
402 eQTL data<sup>89</sup>, protein-protein interaction data<sup>90</sup> or functionally informed SNP-to-gene linking strategies<sup>91</sup>; we caution that  
403 such efforts must strive to avoid biases towards well-studied tissues. Third, since results of  $s_{cDRS}$  depend on the set of cells  
404 (and cell types) in the data set, it is appropriate to interpret the results with respect to other cells (or cell types) in the data set.  
405 We have implemented an option to adjust for cell type proportions (or any cell group annotations) so that the results will only  
406 depend on the set of cell types in the data set (but not the number of cells of each cell type), analogous to other disease-cell type  
407 association methods<sup>7,8,12</sup>; this option is recommended only for extremely unbalanced data sets (see Results and Methods).  
408 Fourth, while we have primarily focused on the associations involving a single disease/trait, further investigation of differences  
409 between diseases/traits within the same category is an important future direction. Please see more discussions, including use of  
410 mouse vs. human single-cell data, in Supp. Note. Despite all these limitations,  $s_{cDRS}$  is a powerful method for distinguishing  
411 disease associations of individual cells in single-cell RNA-seq data.

## 412 Methods

### 413 $s_{cDRS}$ method

414 We consider a scRNA-seq data set with  $n_{\text{cell}}$  cells (not cell types) and  $n_{\text{gene}}$  genes. We denote the cell-gene matrix as  
415  $\mathbf{X} \in \mathbb{R}^{n_{\text{cell}} \times n_{\text{gene}}}$ , where  $X_{cg}$  represents the expression level of cell  $c$  and gene  $g$ . We assume that  $\mathbf{X}$  is size-factor-normalized  
416 (e.g., 10,000 counts per cell) and log-transformed ( $\log(x+1)$ ) from the original raw count matrix<sup>21</sup>. We regress the covariates  
417 out from the normalized data<sup>21</sup> (with a constant term in the regressors to center the data), before adding the original log  
418 mean expression of each gene back to the residual data. Such a procedure preserves the mean-variance relationship in the  
419 covariate-corrected data, which is needed for estimating the gene-specific technical noise levels (see Supp. Note). Please see  
420 Supp. Fig. 2 for distributions of gene-level statistics for the TMS FACS, TMS droplet, and TS FACS data (gene-level statistics  
421 for all 16 data sets are reported in Supp. Table 3). The technical noise levels are moderately correlated across genes between  
422 the 16 data sets (avg. cor. 0.34) and are highly correlated between data sets with similar cell type compositions (e.g., 0.74  
423 between TMS FACS and TS FACS; Supp. Table 4).

424 The  $s_{cDRS}$  algorithm is described in Box 1. Given a disease GWAS and an scRNA-seq data set,  $s_{cDRS}$  computes a  
425 p-value for each individual cell for association with the disease.  $s_{cDRS}$  also outputs cell-level normalized disease scores and  $B$   
426 sets of normalized control scores (default  $B=1,000$ ) that can be used for data visualization and Monte Carlo-based statistical  
427 inference (see Downstream applications and MC test).  $s_{cDRS}$  consists of three steps. First,  $s_{cDRS}$  constructs a set of putative  
428 disease genes from the GWAS summary statistics. Second,  $s_{cDRS}$  computes a raw disease score and  $B$  MC samples of raw  
429 control scores for each cell. Third, after gene set-wise and cell-wise normalization,  $s_{cDRS}$  computes an association p-value for  
430 each cell by comparing its normalized disease score to the empirical distribution of the pooled normalized control scores across  
431 all control gene sets and all cells. These steps are detailed below.

432 **Step 1: Constructing disease gene set.** We use MAGMA<sup>20</sup> to compute gene-level association p-values from disease GWAS  
433 summary statistics (Box 1, step 1). We use a reference panel based on individuals of European ancestry in the 1000 Genomes  
434 Project<sup>92</sup>. We use a 10-kb window around the gene body to map SNPs to genes. We select the top 1,000 genes based on  
435 MAGMA p-values as putative disease genes and use their MAGMA z-scores as the GWAS gene weights. We denote the disease  
436 gene set as  $G \subset \{1, 2, \dots, n_{\text{gene}}\}$  and their GWAS gene weights as  $\{w_g\}_{g \in G}$ . Alternative parameter choices and methods for  
437 constructing putative disease gene sets are considered below (see Alternative versions of  $s_{cDRS}$  method).

438 **Step 2: Computing disease scores and control scores.** We construct  $B$  sets of control genes  $G_1^{\text{ctrl}}, \dots, G_B^{\text{ctrl}}$  by randomly  
439 selecting genes matching the mean expression and expression variance of the disease genes calculated across all cells in the  
440 data set (Box 1, step 2a). Specifically, each control gene set  $G_b^{\text{ctrl}}$  has the same size as the disease gene set  $G$  and is constructed  
441 by first dividing all genes into  $20 \times 20$  equal-sized mean-variance bins and then for each gene in the disease gene set, randomly  
442 sampling a control gene from the same bin (containing the disease genes) without replacement. Next, we estimate the technical  
443 noise level for each gene  $\sigma_{\text{tech},g}^2$  in the scRNA-seq data, the part of the variance due to sequencing noise, using a procedure  
444 similar to previous works<sup>18,21</sup> by modeling the mean-variance relationship across genes; we further compute the raw disease  
445 score and raw control scores for each cell as weighted average expression of genes in the corresponding gene set (Box 1,  
446 steps 2b-2c, Supp. Note). The weight for gene  $g$  is proportional to  $w_g \sigma_{\text{tech},g}^{-1}$  (capped at 10 for both the MAGMA z-score  
447  $w_g$  and single-cell weight  $\sigma_{\text{tech},g}^{-1}$ ), which upweights genes with stronger GWAS associations and downweights genes with  
448 higher levels of technical noise to increase detection power. The single-cell weight  $\sigma_{\text{tech},g}^{-1}$  was adapted from VAM<sup>18</sup>, where the

---

**Box 1** Single-cell disease relevance score ( $s_{cDRS}$ )

---

**Input:** Disease GWAS summary statistics (or putative disease gene set  $G$  with GWAS gene weights  $\{w_g\}_{g \in G}$ ), scRNA-seq data  $\mathbf{X} \in \mathbb{R}^{n_{\text{cell}} \times n_{\text{gene}}}$ .

**Parameters:** Number of MC samples of control gene sets  $B$  (default 1,000).

1: **Construct putative disease gene set**

a: Construct putative disease gene set  $G \subset \{1, 2, \dots, n_{\text{gene}}\}$  with GWAS gene weights  $\{w_g\}_{g \in G}$  from GWAS summary statistics using MAGMA.

2: **Compute disease scores and control scores**

a: Sample  $B$  sets of control genes  $G_1^{\text{ctrl}}, \dots, G_B^{\text{ctrl}}$  matching mean expression and expression variance of disease genes.

b: Estimate gene-specific technical noise level  $\sigma_{\text{tech},g}^2, \forall g \in \{1, \dots, n_{\text{gene}}\}$ .

c: Compute raw disease score and  $B$  raw control scores for each cell  $c = 1, \dots, n_{\text{cell}}$ ,

$$\text{raw disease score: } s_c = \frac{\sum_{g \in G} w_g \sigma_{\text{tech},g}^{-1} X_{cg}}{\sum_{g \in G} w_g \sigma_{\text{tech},g}^{-1}}, \quad B \text{ raw control scores: } s_{cb}^{\text{ctrl}} = \frac{\sum_{g \in G_b^{\text{ctrl}}} w_g \sigma_{\text{tech},g}^{-1} X_{cg}}{\sum_{g \in G_b^{\text{ctrl}}} w_g \sigma_{\text{tech},g}^{-1}}, \quad \forall b \in \{1, \dots, B\} \quad (1)$$

3: **Compute disease association p-values**

a: First gene set alignment by mean and variance. Let  $\sigma_g^2$  be the expression variance of gene  $g$ . For each cell  $c$ ,

$$s_c \leftarrow s_c - \frac{1}{n_{\text{cell}}} \sum_{c'=1}^{n_{\text{cell}}} s_{c'}, \quad s_{cb}^{\text{ctrl}} \leftarrow \left( s_{cb}^{\text{ctrl}} - \frac{1}{n_{\text{cell}}} \sum_{c'=1}^{n_{\text{cell}}} s_{c'b}^{\text{ctrl}} \right) \frac{\sum_{g \in G_b^{\text{ctrl}}} w_g \sigma_{\text{tech},g}^{-1}}{\sum_{g \in G} w_g \sigma_{\text{tech},g}^{-1}} \sqrt{\frac{\sum_{g \in G} w_g^2 \sigma_{\text{tech},g}^{-2} \sigma_g^2}{\sum_{g \in G_b^{\text{ctrl}}} w_g^2 \sigma_{\text{tech},g}^{-2} \sigma_g^2}}, \quad \forall b \in \{1, \dots, B\} \quad (2)$$

b: Cell-wise standardization for each cell  $c$  by the mean  $\hat{\mu}_c^{\text{ctrl}}$  and variance  $\hat{\sigma}_c^{\text{ctrl}}$  of control scores  $s_{c1}^{\text{ctrl}}, \dots, s_{cB}^{\text{ctrl}}$  of that cell,

$$s_c \leftarrow (s_c - \hat{\mu}_c^{\text{ctrl}}) / \hat{\sigma}_c^{\text{ctrl}}, \quad s_{cb}^{\text{ctrl}} \leftarrow (s_{cb}^{\text{ctrl}} - \hat{\mu}_c^{\text{ctrl}}) / \hat{\sigma}_c^{\text{ctrl}}, \quad \forall b \in \{1, \dots, B\} \quad (3)$$

c: Second gene set alignment by mean. For each cell  $c$ ,

$$s_c \leftarrow s_c - \frac{1}{n_{\text{cell}}} \sum_{c'=1}^{n_{\text{cell}}} s_{c'}, \quad s_{cb}^{\text{ctrl}} \leftarrow s_{cb}^{\text{ctrl}} - \frac{1}{n_{\text{cell}}} \sum_{c'=1}^{n_{\text{cell}}} s_{c'b}^{\text{ctrl}}, \quad \forall b \in \{1, \dots, B\} \quad (4)$$

d: Compute cell-level p-values based on the empirical distribution of the pooled normalized control scores for each cell  $c$ ,

$$p_c = \left[ 1 + \sum_{c'=1}^{n_{\text{cell}}} \sum_{b=1}^B \mathbb{I}(s_c \leq s_{c'b}^{\text{ctrl}}) \right] / (1 + n_{\text{cell}} B) \quad (5)$$

**Output:** cell-level p-values  $p_c$ , normalized disease scores  $s_c$ , and normalized control scores  $s_{c1}^{\text{ctrl}}, \dots, s_{cB}^{\text{ctrl}}$ .

---

449 cell-specific score is proportional to  $\sum_{g \in G} \sigma_{\text{tech},g}^{-2} X_{cg}^2$  and was shown to have a superior classification accuracy. Alternative cell  
450 scores (instead of the weighted average score) are evaluated below (see Alternative versions of  $s_{cDRS}$  method).

451 **Step 3: Computing disease-association p-values.** We first describe the alternative distribution that  $s_{cDRS}$  aims to detect.  
452 Since the control genes match the mean expression and expression variance of the disease genes across cells, it can be shown  
453 that the raw disease score has the same mean but a higher variance compared to each set of raw control scores; the higher  
454 variance is because the disease genes are more positively correlated with each other due to co-expression in the associated cell  
455 population (Supp. Fig. 1A-C). As a result, the disease-relevant cells, with high expression of the disease genes, are expected to  
456 have larger raw disease scores than raw control scores. We caution that the disease genes may be more positively correlated  
457 due to other reasons such as being physically close to each other, but  $s_{cDRS}$  will produce much weaker signals in these cases  
458 (Supp. Fig. 5). Please see more details in Supp. Note.

The first gene set alignment (Box 1, step 3a) corrects for the potential mismatch of control gene sets by first centering the scores and then aligning the variance level for each gene set. The variance of the raw disease score is estimated as  $\sum_{g \in G} \tilde{w}_g^2 \sigma_g^2$  and similarly for the raw control scores, with  $\sigma_g^2$  being the expression variance of gene  $g$  and  $\tilde{w}_g = w_g \sigma_{\text{tech},g}^{-1} / \sum_{g \in G} w_g \sigma_{\text{tech},g}^{-1}$  the

corresponding weight; this heuristic assumes independence of the genes (or different gene sets have similar levels of gene-gene correlation), and consequently avoids downweighting the raw disease score due to the higher correlation between disease genes (Supp. Fig. 1D, Supp. Note). After adjusting the control gene sets, the gold standard MC p-values, based on comparison to  $B$  MC samples of raw control scores of the same cell, can be written as<sup>22</sup>

$$p_c^{\text{MC}} = \frac{1 + \sum_{b=1}^B \mathbb{I}(s_c \leq s_{cb}^{\text{ctrl}})}{1 + B}, \forall c \in \{1, \dots, n_{\text{cell}}\}. \quad (6)$$

This finite-sample MC p-value is a conservative estimate of the ideal MC p-value obtained via an infinite number of MC samples<sup>22</sup>. However, as Eq. (6) suggests, an MC test with  $B$  MC samples can only produce an MC p-value no smaller than  $1/(1+B)$ . Instead of using a large number of MC samples which is computationally intensive, we approximate the ideal MC p-value by pooling the control scores across cells. Specifically, we first align the control score distributions (across the  $B$  control gene sets, for each cell) by matching their means and variances, followed by re-centering the mean scores of different gene sets (Box 1, steps 3b-3c, Supp. Fig. 1E,F, Supp. Note). This procedure produces a normalized disease score and  $B$  normalized control scores for each cell. Finally, we compute the  $s_{\text{cDRS}}$  p-values based on the empirical distribution of the pooled normalized control scores across all control gene sets and all cells (Box 1, step 3d). The pooling procedure assumes that the raw control score distributions (across the  $B$  control gene sets, for each cell) are from the same location-scale family (e.g., the family of all normal distributions or that of all student's t-distributions) such that they can be aligned by matching the first two moments; it is a reasonable assumption when the number of disease genes is neither too small nor too large (e.g.,  $50 < |G| < 20\%n_{\text{gene}}$ ), where the control score distributions are close to normal distributions by the central limit theorem (Supp. Note). As shown in Supp. Fig. 1G-I, the  $s_{\text{cDRS}}$  p-values with  $B=1,000$  is indeed able to well approximate the MC p-values obtained using a much larger number of MC samples ( $B=20,000$ ).

### Downstream applications and MC test

$s_{\text{cDRS}}$  outputs individual cell-level p-values, (normalized) disease scores, and (normalized) control scores that can be used for a wide range of downstream applications: assessing association between a given cell type and a given disease; assessing heterogeneity in association with a given disease across a given set of cells; and assessing association between a cell-level variable and a given disease across a given set of cells. We use a unified MC test for these 3 analyses based on the disease score and control scores. Specifically, let  $t$  be the test statistic computed from the disease score of the given set of cells (the 3 analyses differ by the test statistics they use) and let  $t_1^{\text{ctrl}}, \dots, t_B^{\text{ctrl}}$  be the same test statistics computed from the  $B$  sets of control scores of the same set of cells. The MC p-value can be written as

$$p^{\text{MC}} = \frac{1 + \sum_{b=1}^B \mathbb{I}(t \leq t_b^{\text{ctrl}})}{1 + B}. \quad (7)$$

The MC test avoids the assumption that the cells are independent—a strong assumption in scRNA-seq analyses, e.g., when analyzing cells in the same cluster that are dependent due to the clustering process. We can also compute an MC z-score as  $z^{\text{MC}} = [t - \text{Mean}(\{t_b^{\text{ctrl}}\}_{b=1}^B)] / \text{SD}(\{t_b^{\text{ctrl}}\}_{b=1}^B)$ ; this MC z-score is not restricted by the MC limit of  $1/(1+B)$  but relies the assumption that the control test statistics  $\{t_b^{\text{ctrl}}\}_{b=1}^B$  approximately follow a normal distribution. Below, we describe the test statistics used by the 3 analyses listed above. We note that the MC test can in principle be extended to any analysis that computes a test statistic from the disease scores of a set of cells.

**Assessing association between a given cell type and a given disease.** We use the top 5% quantile of the disease scores of cells from the given cell type as the test statistic. This test statistic is robust to annotation outliers, e.g., a few misannotated but highly significant cells. One can also use other test statistics such as the top 1% quantile or the maximum.

**Assessing heterogeneity in association with a given disease across a given set of cells.** We use Geary's  $C^{16,93}$  as the test statistic. Geary's  $C$  measures the spatial autocorrelation of the disease score across a set of cells (e.g., cells from the same cell type or cell cluster) with respect to a cell-cell similarity matrix. Given a set of  $n$  cells, the corresponding disease scores  $s_1, \dots, s_n$ , and the cell-cell similarity matrix  $W \in \mathbb{R}^{n \times n}$ , Geary's  $C$  is calculated as

$$C = \frac{(n-1) \sum_{i,j} W_{ij} (s_i - s_j)^2}{2(\sum_{i,j} W_{ij}) \sum_i (s_i - \bar{s})^2}, \quad (8)$$

where  $\bar{s} = \frac{1}{n} \sum_{i=1}^n s_i$ . We use the cell-cell connectivity matrix for the similarity matrix like previous works<sup>16</sup>, which corresponds to the “connectivities” output from the scanpy function “scanpy.pp.neighbors”<sup>94</sup>. A value significantly lower than 1 indicates positive spatial autocorrelation, suggesting cells close to each other on the similarity matrix have similar disease scores, forming subclusters of cells with similar levels of disease association. This indicates a high level of disease association heterogeneity across the given set of cells. We use this test to assess within-cell type disease association heterogeneity and within-cluster association disease heterogeneity.

489 **Assessing association between a cell-level variable and a given disease across a given set of cells.** For associating a  
490 single cell-level variable with disease, we use the Pearson's correlation between the cell-level variable and the disease score  
491 across the given set of cells as the test statistic. For jointly associating multiple cell-level variables with disease, we use the  
492 regression  $t$ -statistic as the test statistic, obtained from jointly regressing the disease score against the cell-level variables.

### 493 **Computational cost**

494 Both the computation time and memory use of  $s_{\text{cDRS}}$  scale linearly with the number of cells and the number of control  
495 gene sets (default 1,000). We performed benchmark experiments by subsampling cells from the Nathan et al. data<sup>64</sup> and,  
496 as expected, observed a linear relationship between the number of cells and both the computation time and memory usage  
497 (Supp. Fig. 3).  $s_{\text{cDRS}}$  required 1.6 hours of computation time and 30GB of memory to process 500K cells under the default  
498 setting (1,000 control gene sets); it is estimated to take around 3 hours and 60GB of memory to run  $s_{\text{cDRS}}$  on a data set with  
499 a million cells and a similar level of sparsity. Of note, in this experiment, the memory usage is only 1.5X of the theoretical  
500 lower limit, namely 18.9G consisting of 11.4G for loading the data in high precision (64-bit float) and 7.5G for computing the  
501 1,000 sets of raw and normalized control scores for each cell ( $2 \times 500,089 \times 1,000 \times 8\text{B} = 7.5\text{G}$ ); the memory usage is 3X of  
502 the theoretical lower limit for low-precision computation. Therefore,  $s_{\text{cDRS}}$  is reasonably efficient in memory usage. Based  
503 on this benchmark experiment, we also suggest an empirical formula for estimating the memory usage (in the unit of GB) as  
504  $3 \times (\text{low\_precision\_data\_size} + n_{\text{cell}}B \times 8/1024^3)$ .

### 505 **Simulations**

506 We performed simulations on a data set with 10,000 cells subsampled from the TMS FACS data. In null simulations, we  
507 randomly selected putative disease genes from a set of non-informative genes. We considered four numbers of putative disease  
508 genes (100, 500, 1,000, or 2,000) and four types of genes to sample from: (1) the set of all genes, (2) the set of top 25% genes  
509 with high mean expression, (3) the set of top 25% genes with high expression variance, (4) the set of top 25% overdispersed  
510 genes, where the level of overdispersion is calculated as the difference between the actual variance and the estimated technical  
511 variance in the log scale data. For the default version of  $s_{\text{cDRS}}$ , we simulated GWAS gene weights by first randomly selecting  
512 a disease (out of the 74 diseases/traits) and then randomly permuting the top MAGMA z-scores from the selected disease. We  
513 did not simulate gene-specific technical noise-based single-cell weights because these weights were inherent to the single-cell  
514 data. For the MC test for cell type-disease association, we used the top 5% quantile as the test statistic and computed the  
515 MC p-values for each cell type and each set of random putative disease genes by comparing the test statistic from the disease  
516 scores to those computed from the 1,000 sets of control scores (see Monte-Carlo-based downstream analyses above). In causal  
517 simulations, we randomly selected 1,000 causal disease genes, randomly selected 500 of the 10,000 cells as causal cells and  
518 artificially perturbed their expression levels to be higher (at various effect sizes) across the 1,000 causal disease genes, and  
519 randomly selected 1,000 putative disease genes (provided as input to  $s_{\text{cDRS}}$  and other methods) with various levels of overlap  
520 with the 1,000 causal disease genes. Here, the effect size corresponds to the fold change of expression of the causal genes in  
521 the causal cells (multiplicative in the original count space and additive in the log space). We performed three sets of causal  
522 simulations: (1) varying effect size from 5% to 50% while fixing 25% overlap, (2) varying level of overlap from 5% to 50%  
523 while fixing 25% effect size, (3) assigning the 528 B cells in the subsampled data to be causal (instead of the 500 randomly  
524 selected cells; varying effect size while fixing 25% overlap). The FDR and power reported in Fig. 2B and Supp. Fig. 6 are based  
525 on applying the B-H procedure<sup>95</sup> to all cells at nominal FDR=0.1. All experiments were repeated 100 times and confidence  
526 intervals were computed based on the normal distribution. We considered three methods for comparison, namely Seurat<sup>15</sup>  
527 ("score\_genes" as implemented in scanpy<sup>94</sup>), Vision<sup>16</sup>, and VAM<sup>18</sup>. To our knowledge, VAM is the only published cell-scoring  
528 method that provides cell-level association p-values. We chose to include Seurat due to its wide use and standardized its output  
529 cell-level scores (mean 0 and SD 1) before computing the cell-level p-values based on the standard normal distribution. We  
530 chose to include Vision because its outputs are nominal cell-level z-scores and can be easily converted to p-values; we again  
531 added the standardization step because otherwise the results of Vision were highly unstable. We did not include other methods  
532 like PAGODA<sup>14</sup> or AUCCell<sup>14</sup> because it is not straightforward to convert their outputs to cell-level association p-values and also  
533 because the z-scoring methods (e.g., Vision) outperformed other methods in a comprehensive evaluation in Frost et al.<sup>18</sup>

### 534 **GWAS summary statistic data sets**

535 We analyzed GWAS summary statistics of 74 diseases and complex traits from the UK Biobank<sup>96</sup> (47 of the 74 diseases/traits  
536 with average  $N=415\text{K}$ ) and other publicly available sources<sup>32,97-118</sup> (27 of the 74 diseases/traits with average  $N=225\text{K}$ ); average  
537  $N=346\text{K}$  for all 74 diseases/traits; Supp. Table 1). All diseases and traits were well-powered (heritability  $z\text{-score} > 5$ ), except  
538 celiac disease (Celiac), systemic lupus erythematosus (SLE), multiple sclerosis (MS), subject well being (SWB), and type 1  
539 diabetes (T1D), which were included due to their clinical importance. The major histocompatibility complex (MHC) region  
540 was removed from all analyses because of its unusual LD and genetic architecture<sup>119</sup>.



## 541 **scRNA-seq data sets**

542 We analyzed 16 scRNA-seq or snRNA-seq data sets (Supp. Table 2). We included 3 atlas-level data sets (TMS FACS, TMS  
543 droplet, and TS FACS) to broadly associate diverse cell types and cell populations to disease; these 3 data sets cover different  
544 species (mouse and human) and different technologies (FACS and droplet), which allows us to assess the robustness of our  
545 results across different species and technologies. We included another 13 data sets that focus on a single tissue and contain  
546 finer-grained annotations of cell types and cell states. Notably, several of these data sets contain experimentally determined  
547 annotations which allow us to better validate our results, including Cano-Gamez & Soskic et al. data<sup>51</sup> containing experimentally  
548 perturbed CD4<sup>+</sup> T cell states, Nathan et al. data<sup>64</sup> containing T cells states determined by profiling surface markers using  
549 CITE-seq, Habib & Li et al. data<sup>69</sup> containing experimentally determined spatial locations for CA1 pyramidal neurons based on  
550 ISH of spatial landmark genes, Ayhan et al. data<sup>70</sup> containing experimentally determined spatial locations for CA1 pyramidal  
551 neurons (dorsal and ventral) based on surgical resection, and Richter & Deligiannis et al. data<sup>82</sup> containing experimentally  
552 determined hepatocyte ploidy levels based on Hoechst staining.

## 553 **Adjusting for cell type proportions**

554  $s_{cDRS}$  can additionally take a set of cell type annotations (or any cell group annotations) and adjust for cell type proportions  
555 by inversely weighting cells by the number of cells in the corresponding cell type (weights were normalized to have mean 1 and  
556 were constrained between 0.1 and 10). This version of  $s_{cDRS}$  generated highly consistent as the default version in the TMS  
557 FACS data (median of 0.97 across 74 traits for the disease score correlation computed across all TMS FACS cells) and was  
558 well-calibrated in null simulations (Supp. Fig. 4). We recommend the use of this new option only for extremely unbalanced  
559 data sets, for 3 reasons. First, it produced consistent results for relatively balanced data sets such as TMS FACS. Second, it  
560 requires cell type annotations where the cell types have a similar level of granularity (e.g., B cells vs. T cells instead of B cells  
561 vs. a subtype of CD4<sup>+</sup> Th17 cells), which is not always available. For example, the TMS cell type annotation contains both  
562 high-level cell types like T cells and more fine-grained cell types like Tregs. Third, the cell type annotation can be defined with  
563 different levels of granularity, such as broader types like immune cells or very specific types like CD4<sup>+</sup> Th17 cells, and it is  
564 unclear how to choose the right level of granularity for a given data set.

## 565 **Comparison with other cell type-level association methods**

566 We briefly discuss the similarities and differences between  $s_{cDRS}$  and 3 cell type-level association methods that also make use  
567 of MAGMA: the MAGMA-based method in Skene et al.<sup>26</sup>, Watanabe et al.<sup>7</sup>, and the MAGMA-based method in Bryois et  
568 al.<sup>8</sup> All statements about  $s_{cDRS}$  apply to both individual cell level-analysis and cell type-level analysis. First, all 4 methods  
569 focus on specifically-expressed genes in a cell type (or cell) rather than merely highly-expressed genes. Second, all 4 methods  
570 produce results that depend on cell types (cells) present in the data set, so it is important to interpret the results with respect to  
571 other cell types (cells) in the data set. Third,  $s_{cDRS}$  and the method of Watanabe et al. depend on different scaling factors  
572 for size factor normalization (while the other 2 methods do not). However, we determined this step is crucial for removing  
573 confounding effects, and  $s_{cDRS}$  is not sensitive to different choices of scaling factors (Results). Fourth, the other 3 methods  
574 use linear regression to associate MAGMA z-scores with cell type features across genes (cell type expression level in Watanabe  
575 et al.; cell type specificity in Skene et al. and Bryois et al.).  $s_{cDRS}$  can be viewed as a non-parametric alternative to these  
576 methods, employing a stratified permutation test that associates MAGMA z-scores for top genes with expression levels for a  
577 given cell by permuting genes within each level of expression mean and variance. Thus, unlike the other 3 methods,  $s_{cDRS}$   
578 does not rely on a linearity assumption. Fifth,  $s_{cDRS}$  may be more powerful when there is within-cell type heterogeneity in  
579 association to disease. Further details are provided in the Supp. Note.

## 580 **Alternative versions of $s_{cDRS}$ method**

581 We considered alternative versions of  $s_{cDRS}$ , involving (1) other choices of MAGMA gene window size, (2) other strategies  
582 for selecting putative disease genes, (3) other methods for choosing gene weights for the selected putative disease genes, (4) an  
583 alternative overdispersion score (instead of weighted average), and (5) other methods for constructing putative disease genes.

584 We considered 3 MAGMA gene window sizes for mapping SNPs to genes: 0 kb, 10 kb (default), and 50 kb. We considered  
585 6 strategies for selecting putative disease genes: top 100, top 500, top 1,000 (default), top 2,000, FWER<5%, FDR<1%  
586 (multiple testing correction performed based on MAGMA p-values for each trait separately; number of top genes constrained  
587 between 100 and 2,000 for the latter two methods). We considered 4 methods for choosing gene weights for the selected  
588 putative disease genes: no weights, GWAS z-score weights (proportional to MAGMA z-score capped at 10), single-cell VS  
589 weights (proportional to reciprocal of technical noise level  $\sigma_{tech,g}^{-1}$  capped at 10), and using both sets of weights (default). We  
590 evaluated the performance based on a curated set of 20 traits with expected and unexpected disease-critical cell types; we  
591 caution that some cell types labeled as unexpected may still be relevant to disease despite not being implicated in the current  
592 literature (Supp. Fig. 12, Supp. Table 17). The default version of  $s_{cDRS}$  substantially outperformed all other versions except  
593 the version that uses the top 2,000 genes for the gene selection method. This latter version was not chosen as the default

594 because it was not significantly better than using the top 1,000 genes and  $s_{\text{CDRS}}$  was less well-calibrated for gene sets with  
595 2,000 genes.

The overdispersion score is defined as

$$s_c = \frac{\sum_{g \in G} [(X_{cg} - \mu_g)^2 - \sigma_{\text{tech},g}^2] / \sigma_{\text{tech},g}^2}{\sum_{g \in G} 1 / \sigma_{\text{tech},g}^2}, \quad (9)$$

596 where  $\mu_g$  and  $\sigma_{\text{tech},g}^2$  are the average expression and technical noise level of gene  $g$  respectively. The overdispersion score tests  
597 for both overexpression and underexpression of the putative disease genes in the relevant cell population (unlike the weighted  
598 average score which only tests for overexpression of the disease genes). We compared the overdispersion score to two versions  
599 of  $s_{\text{CDRS}}$  that only tested for overexpression: the default version (GWAS+single-cell weights) and the unweighted score. We  
600 assessed the performance in terms of number of significant discoveries in TMS FACS across the 74 diseases (details in Supp.  
601 Fig. 14).

602 We also discuss other methods for constructing putative disease genes. While we constructed putative disease genes using  
603 GWAS data and mapped SNPs to genes based on genomic locations, it may be possible to obtain a more accurate disease gene  
604 set by either incorporating data from other sources such as protein-protein interaction data<sup>90</sup> or using a more sophisticated  
605 SNP-to-gene linking strategy<sup>91</sup>; exploring these approaches is an interesting future direction.

### 606 Analysis of T cells and autoimmune diseases

607 We collectively analyzed all T cells from the TMS FACS data (4,125 cells labeled as CD4<sup>+</sup>  $\alpha$ - $\beta$  T cell, CD8<sup>+</sup>  $\alpha$ - $\beta$  T cell,  
608 regulatory T cell, mature NK T cell, mature  $\alpha$ - $\beta$  T cell, or T cell in the TMS data; Supp. Table 5); the more general terms  
609 like “T cell” and “mature  $\alpha$ - $\beta$  T cell” were used for cells whose more specific identities were not clear. We processed the T  
610 cells following the standard procedure using scanpy<sup>94</sup>. First, we performed size factor normalization (10,000 counts per cell)  
611 and log transformation. Second, we selected highly variable genes and computed the batch-corrected PCA embedding using  
612 Harmony<sup>120</sup>, treating each mouse as a batch. Finally, we constructed KNN graphs and clustered the cells using the Leiden  
613 algorithm<sup>121</sup> (resolution=0.7), followed by computing the UMAP embedding. We removed 376 cells either from small clusters  
614 (less than 100 cells) or whose identities are ambiguous, resulting in 3,769 cells. We annotated the clusters based on the major  
615 TMS cell types in the cluster; the label “mature  $\alpha$ - $\beta$  T cell” was omitted because a more specific TMS cell type label (e.g.,  
616 “CD8<sup>+</sup>  $\alpha$ - $\beta$  T”) was available in the corresponding cluster. We considered cells from clusters 1-4 as clear CD4<sup>+</sup> T cells (1,686  
617 cells) and cells from clusters 1, 2, 7-9 as clear CD8<sup>+</sup> T cells (2,197 cells; the shared clusters 1 and 2 contain a mix of naive  
618 CD4<sup>+</sup> and CD8<sup>+</sup> T cells). We used diffusion pseudotime (DPT)<sup>52</sup> to assign effectorness gradient for CD4<sup>+</sup> and CD8<sup>+</sup> T cells  
619 separately, where we used the leftmost cell in cluster 2 on the UMAP as the root cell (clearly naive T cell).

620 To robustly annotate disease-associated T cell subpopulations, we performed 2 sets of automatic T cell subtype analyses:  
621 classification based on marker gene expression (details in Supp. Fig. 18) and automatic T cell states annotation using  
622 projecTILE<sup>42</sup> (v2.0.2). The two sets of annotations were consistent for distinguishing effector vs. naive T cells and distinguishing  
623 CD4<sup>+</sup> vs. CD8<sup>+</sup> T cells, suggesting the results were overall consistent. Since the projecTILE reference contained a limited  
624 set of T cell subtypes (e.g., no Th2 or Th17 cells), we used the marker gene-based annotation for the main results. For the  
625 analysis of individual cells associated with IBD, we considered 4 major clusters of T cells with >25 IBD-associated cells  
626 (FDR<0.1). First, the subpopulation of 123 IBD-associated cells in cluster 3 (which consisted of 629 cells with TMS cell type  
627 labels “CD4<sup>+</sup>  $\alpha$ - $\beta$  T” or “regulatory T”) were labeled as “Treg” as described in the main paper. Second, the 78 IBD-associated  
628 cells in cluster 4 (which consisted of 165 cells with TMS cell type label “CD4<sup>+</sup>  $\alpha$ - $\beta$  T”) were labeled as “Th2/Treg-like” as  
629 described in the main paper. Their specifically expressed genes significantly overlapped with a *KLRG1*<sup>+</sup> *AREG*<sup>+</sup> effector-like  
630 Treg program<sup>43</sup> characterized by high expression levels of *IL1RL1* (*ST2*), *KLRG1*, and *AREG* ( $P = 1.3 \times 10^{-50}$ , Fisher’s exact  
631 test; Supp. Fig. 20D), suggesting these cells had active functions for Treg differentiation, immunosuppression, and tissue  
632 repair<sup>43</sup>. Third, the 85 IBD-associated cells in cluster 5 (which consisted of 370 cells with TMS cell type label “T cell”) were  
633 labeled as “Th17-like” as described in the main paper. Their specifically expressed genes significantly overlapped with Th17  
634 signatures ( $P = 2.0 \times 10^{-6}$ , Fisher’s exact test; Supp. Fig. 20C) and a Th17-like Treg program<sup>43</sup> ( $P = 1.9 \times 10^{-24}$ , Fisher’s  
635 exact test; Supp. Fig. 20D), suggesting Th17 proinflammatory functions. Finally, the 41 IBD-associated cells in cluster 9  
636 (consisting of 499 cells with TMS cell type label “CD8<sup>+</sup>  $\alpha$ - $\beta$  T”) were labeled as “CD8<sup>+</sup> effector-like” as described in the  
637 main paper. Their specifically expressed genes significantly overlapped with effector CD8<sup>+</sup> T cell signatures ( $P = 1.6 \times 10^{-9}$ ,  
638 Fisher’s exact test; Supp. Fig. 20C), suggesting cytotoxic T cell functions. For the analysis of individual cells associated with  
639 HT, the putative identities of HT-associated cells in clusters 3,4,9 were similar to the putative identities of IBD-associated cells  
640 in the corresponding clusters. The 44 HT-associated cells in cluster 10 (consisting of 112 cells with TMS cell type label “T  
641 cell”) were labeled as “Proliferative” due to high expression of proliferation markers (Supp. Fig. 18,20B).

642 We used MSigDB<sup>122,123</sup> (v7.1) to curate T cell signature gene sets, including naive CD4, memory CD4, effector CD4,  
643 naive CD8, memory CD8, effector CD8, Treg, Th1 (T helper 1), Th2 (T helper 2), and Th17 (T helper 17) signatures. For each

644 T cell signature gene set, we identified a set of relevant MSigDB gene sets (22-34, Supp. Table 9), followed by selecting the top  
645 100 most frequent genes in these MSigDB gene sets as the T cell signature genes; a gene was required to appear at least twice  
646 and genes appearing the same number of times were all included, resulting in 62 to 513 genes for the 10 T cell signature gene  
647 sets (Supp. Table 10). For gold-standard gene sets used in the analysis of disease gene prioritization, we curated 27 putative  
648 drug target gene sets from Open Targets<sup>57</sup> (mapped to 27 of the 74 diseases/traits considered in the paper; Supp. Table 21); for  
649 a given disease, we selected all genes with drug score >0 (clinical trial phase 1 and above) and only considered diseases with at  
650 least 10 putative drug target genes. We curated 16 Mendelian diseases gene sets from Freund et al.<sup>58</sup> (mapped to 45 of the 74  
651 diseases/traits considered in the paper; Supp. Table 21). For comparison of two gene sets, the p-value is based on Fisher's exact  
652 test and excess overlap is defined as the ratio between the observed overlap of the two gene sets and the expected overlap (by  
653 chance). Of note, for a given query gene set with a fixed size and a fixed level of excess overlap with the reference gene set, the  
654  $-\log_{10}$  p-value increases with the size of the reference gene set; we report both excess overlap and  $-\log_{10}$  p-value while using  
655 the former as our primary metric, which is more interpretable.

### 656 Analysis of neurons and brain-related diseases/traits

657 For the TMS FACS data, we focused on the 484 neurons (TMS label "neuron", excluding cells with TMS label "medium  
658 spiny neuron" or "interneuron"). For the Zeisel & Muñoz-Manchado et al. data, we applied scDRS to all 3,005 cells and  
659 then focused on the 827 CA1 pyramidal neurons ("level1class" label "pyramidal CA1"). For inferring spatial coordinates,  
660 we curated differentially expressed genes for each of the 6 spatial regions (dorsal vs. ventral, ventral vs. dorsal, proximal vs.  
661 distal, distal vs. proximal, deep vs. superficial, and superficial vs. deep) using the gene expression data from Cembrowski  
662 et al.<sup>68</sup> (GEO GSE67403; gene sets in Supp. Table 10). For each differential gene expression analysis, we selected genes  
663 based on FPKM>10 for the average expression in the enriched region (e.g., dorsal for the dorsal vs. ventral comparison),  
664  $q$ -value<0.05, and  $\log_2$ (fold change) >2. We used scDRS and these signature gene sets to assign 6 spatial scores for each cell.  
665 For the regression analysis, we separately regressed the scDRS disease scores for each of the 7 brain-related traits (and height,  
666 a negative control trait) on each of the 6 spatial scores. We performed marginal regression instead of joint regression for these  
667 spatial scores because the inferred spatial scores for opposite regions on the same axis (e.g., dorsal vs. ventral) were highly  
668 collinear (strongly negatively correlated), and the inferred spatial scores for dorsal, proximal, and deep regions (which had  
669 strong marginal associations to diseases) had very low pairwise correlations (average  $|r|$  =0.10; Supp. Fig. 28D), suggesting  
670 these associations were independent. We reported correlation p-values (MC test) and variance explained for each of the 6  
671 spatial scores.

### 672 Analysis of hepatocytes and metabolic traits

673 We considered all hepatocytes in the TMS FACS data (1,162 cells) and reprocessed them following the same procedure as we  
674 did for the T cells. We further filtered out low-quality cells (mitochondrial proportion  $\geq$ 0.3; likely to be apoptotic or lysing  
675 cells), resulting in 1,102 hepatocytes (Fig. 5C). We curated signature gene sets for ploidy level, zonation, and putative zoned  
676 pathways. We curated 4 sets of polyploidy signatures, including differentially expressed genes (DEGs) for partial hepatectomy  
677 (PH) vs. pre-PH<sup>81</sup> (used for the polyploidy score), Cdk1 knockout (case) vs. control<sup>81</sup>, 4n vs. 2n hepatocytes<sup>82</sup>, large vs. small  
678 hepatocytes<sup>81</sup>. We curated 3 sets of diploidy signatures, including DEGs for pre-PH vs. PH<sup>81</sup>, control vs. Cdk1 knockout<sup>81</sup>,  
679 and 2n vs. 4n hepatocytes<sup>82</sup>. We curated signature gene sets for pericentral (CV) and periportal (PN) hepatocytes from Halpern  
680 et al.<sup>83</sup>. We curated gene sets for putative zoned pathways from MSigDB<sup>122,123</sup> (v7.1), including glycolysis (pericentral),  
681 bile acid production (pericentral), lipogenesis (pericentral), xenobiotic metabolism (pericentral), beta-oxidation (periportal),  
682 cholesterol biosynthesis (periportal), protein secretion (periportal), and gluconeogenesis (periportal). All signature gene sets  
683 are reported in Supp. Table 10. For the joint regression analysis of scDRS disease score on ploidy and zonation scores, we  
684 regressed the polyploidy score out of both the pericentral and periportal score before the joint regression because the ploidy  
685 level confounded both zonation scores. We performed joint regression instead of marginal regression here (unlike the regression  
686 analysis in the neuron section) because the polyploidy score was positively correlated with the pericentral and periportal scores  
687 (unlike the analysis in the neuron section where the 3 sets of scores had low correlations).

### 688 Data availability

689 We release our data at [https://figshare.com/projects/Single-cell\\_Disease\\_Relevance\\_Score\\_scDRS\\_](https://figshare.com/projects/Single-cell_Disease_Relevance_Score_scDRS_/118902)  
690 [/118902](https://figshare.com/projects/Single-cell_Disease_Relevance_Score_scDRS_/118902) (instructions at <https://github.com/martinjzhang/scDRS>), including GWAS summary statistics of  
691 the 74 diseases/traits, TMS FACS scRNA-seq data, reprocessed TMS FACS data (for T cells and hepatocytes), MAGMA  
692 and gold standard gene sets, and scDRS results for TMS FACS (disease scores and control scores for the 74 diseases/traits).  
693 The 16 scRNA-seq data sets were obtained as follows. The TMS FACS data and TMS droplet data<sup>19</sup> was downloaded  
694 from the official release [https://figshare.com/articles/dataset/Processed\\_files\\_to\\_use\\_with\\_](https://figshare.com/articles/dataset/Processed_files_to_use_with_scanpy_/8273102)  
695 [scanpy\\_/8273102](https://figshare.com/articles/dataset/Processed_files_to_use_with_scanpy_/8273102). The TS FACS data<sup>25</sup> was downloaded from the official release <https://figshare.com/>

696 [articles/dataset/Tabula\\_Sapiens\\_release\\_1\\_0/14267219](#). The Cano-Gamez & Soskic et al. data<sup>51</sup> was  
697 downloaded from <https://www.opentargets.org/projects/effectorness>. The Nathan et al. data<sup>64</sup> was  
698 downloaded from <https://www.ncbi.nlm.nih.gov/geo/query/acc.cgi?acc=GSE158769>. The Zeisel &  
699 Muñoz-Manchado et al. data<sup>65</sup> was downloaded from <http://linnarssonlab.org/cortex/>. The Zeisel et al.  
700 data<sup>73</sup> was downloaded from <http://mousebrain.org/downloads.html>. The Habib & Li et al. data<sup>69</sup> and  
701 Habib, Avraham-Davidi, & Basu et al. data<sup>75</sup> were downloaded from [https://singlecell.broadinstitute.org/  
702 single\\_cell](https://singlecell.broadinstitute.org/single_cell). The Ayhan et al. data<sup>70</sup> was downloaded from <https://cells.ucsc.edu/human-hippo-axis/>.  
703 The Yao et al. data<sup>74</sup> was downloaded from <https://assets.nemoarchive.org/dat-jb2f34y>. The Zhong et  
704 al. data<sup>76</sup> was downloaded from <https://www.ncbi.nlm.nih.gov/geo/query/acc.cgi?acc=GSE119212>.  
705 The Aizarani et al. data<sup>86</sup> was downloaded from [https://www.ncbi.nlm.nih.gov/geo/query/acc.cgi?acc=  
706 GSE124395](https://www.ncbi.nlm.nih.gov/geo/query/acc.cgi?acc=GSE124395). Halpern & Shenhav et al. data<sup>83</sup> was downloaded from [https://www.ncbi.nlm.nih.gov/geo/  
707 query/acc.cgi?acc=GSE84498](https://www.ncbi.nlm.nih.gov/geo/query/acc.cgi?acc=GSE84498). The Richter & Deligiannis et al. data<sup>82</sup> (annotated count matrix) was obtained via  
708 communication with the authors (raw data publicly available via links in the paper). The Taychameekiatchai et al. data<sup>85</sup> is not  
709 publicly available, but was obtained via communication with the authors.

## 710 **Code availability**

711 Software implementing scDRS and its downstream applications and a web interface for interactively exploring results of  
712 scDRS are available at <https://github.com/martinjzhang/scDRS>.

## 713 **Acknowledgements**

714 We thank Huwenbo Shi, Katherine Siewert-Rocks, Tiffany Amariuta, Xiaoyu Xu, Benjamin J Strober, and Alexander Gusev  
715 for helpful suggestions. This research was funded by NIH grants U01 HG009379, R01 MH101244, R37 MH107649, R01  
716 MH115676, and U01 HG012009.

## 717 **Competing interests**

718 The authors declare no competing interests.



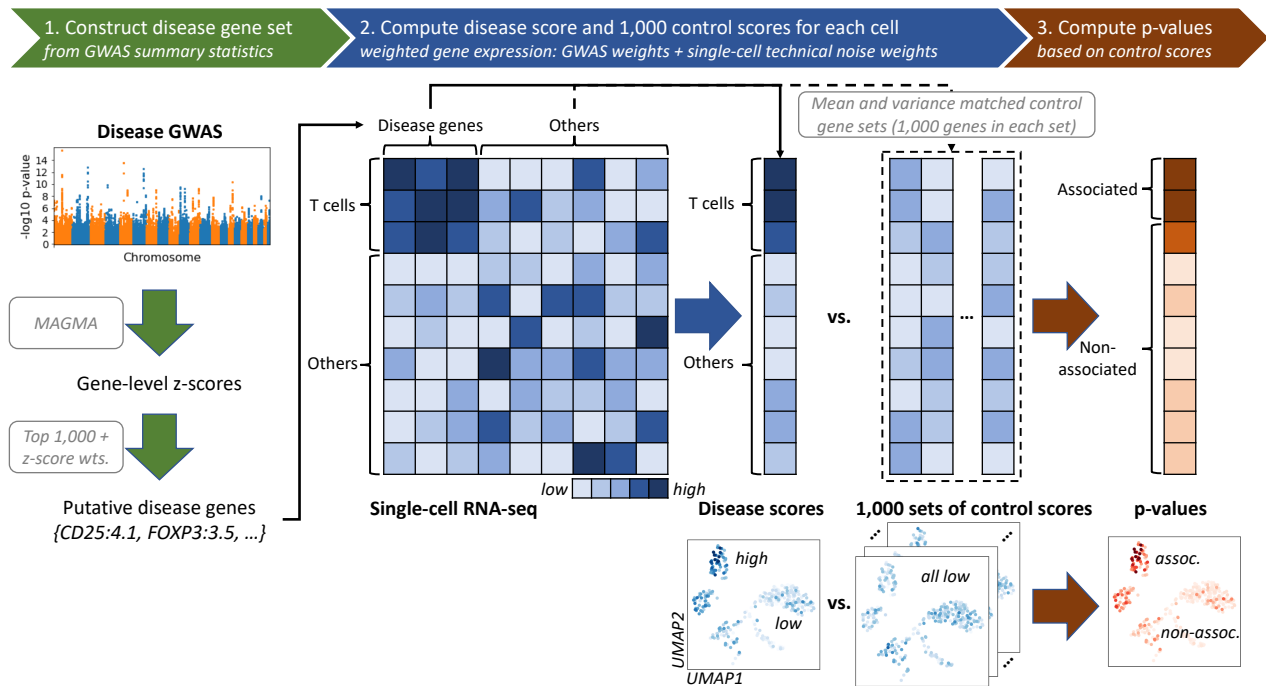

**Figure 1. Overview of sCDRS method.** sCDRS takes a disease GWAS and an scRNA-seq data set as input and outputs individual cell-level p-values for association with the disease. **(1)** sCDRS constructs a set of putative disease genes from GWAS summary statistics by selecting the top 1,000 MAGMA genes; these putative disease genes are expected to have higher expression levels in the relevant cell population. **(2)** sCDRS computes a raw disease score for each cell, quantifying the aggregate expression of the putative disease genes in that cell; to maximize power, each putative disease gene is weighted by its GWAS MAGMA z-score and inversely weighted by its gene-specific technical noise level in scRNA-seq. sCDRS also computes a set of 1,000 Monte Carlo raw control scores for each cell, in each case using a random set of control genes matching the gene set size, mean expression, and expression variance of the putative disease genes. **(3)** sCDRS normalizes the raw disease score and raw control scores across gene sets and across cells, and then computes a p-value for each cell based on the empirical distribution of the pooled normalized control scores across all control gene sets and all cells. The choice of 1,000 for the number of putative disease genes and the choice of 1,000 for the number of control scores are independent.

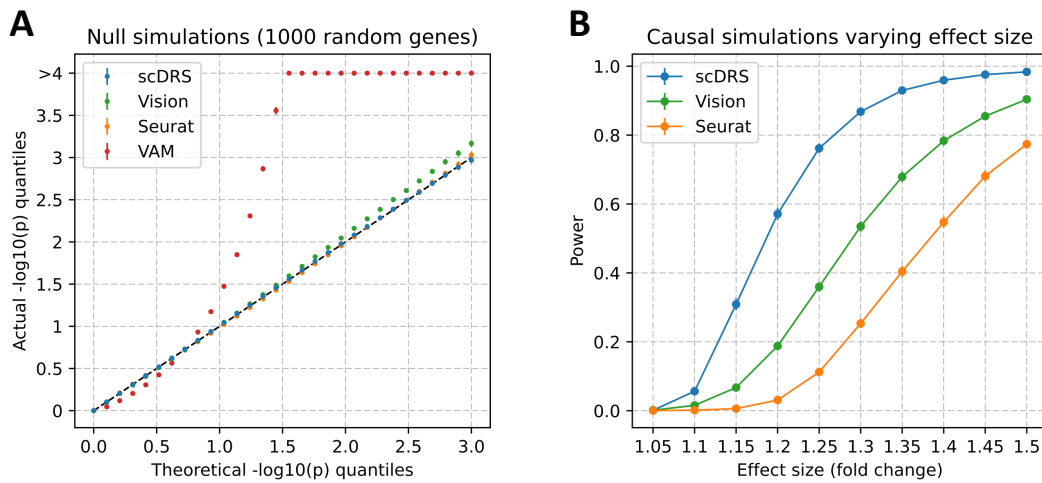

**Figure 2. Results for null and causal simulations.** (A) Q-Q plot for null simulations using 1,000 randomly selected genes as the putative disease genes. Random GWAS gene weights were used for *scDRS* matching the MAGMA z-score distributions in real traits while binary gene sets were used for the other 3 methods. The x-axis denotes theoretical  $-\log_{10}$  p-value quantiles and the y-axis denotes actual  $-\log_{10}$  p-value quantiles for different methods. Each point is based on 100 simulation replicates (with 10,000 cells per simulation replicate); error bars denote 95% confidence intervals (all error bars are  $<0.05$  from the point estimate). Numerical results are reported in Supp. Table 11 and additional results are reported in Supp. Fig. 4. (B) Power for causal simulations with perturbed expression of causal genes in causal cells. We report the power at FDR=0.1 for different methods and different effect sizes. Each point is based on 100 simulation replicates (with 10,000 cells per simulation replicate); error bars denote 95% confidence intervals (all error bars are  $<0.02$  from the point estimate). Numerical results are reported in Supp. Table 13 and additional results are reported in Supp. Fig. 6.

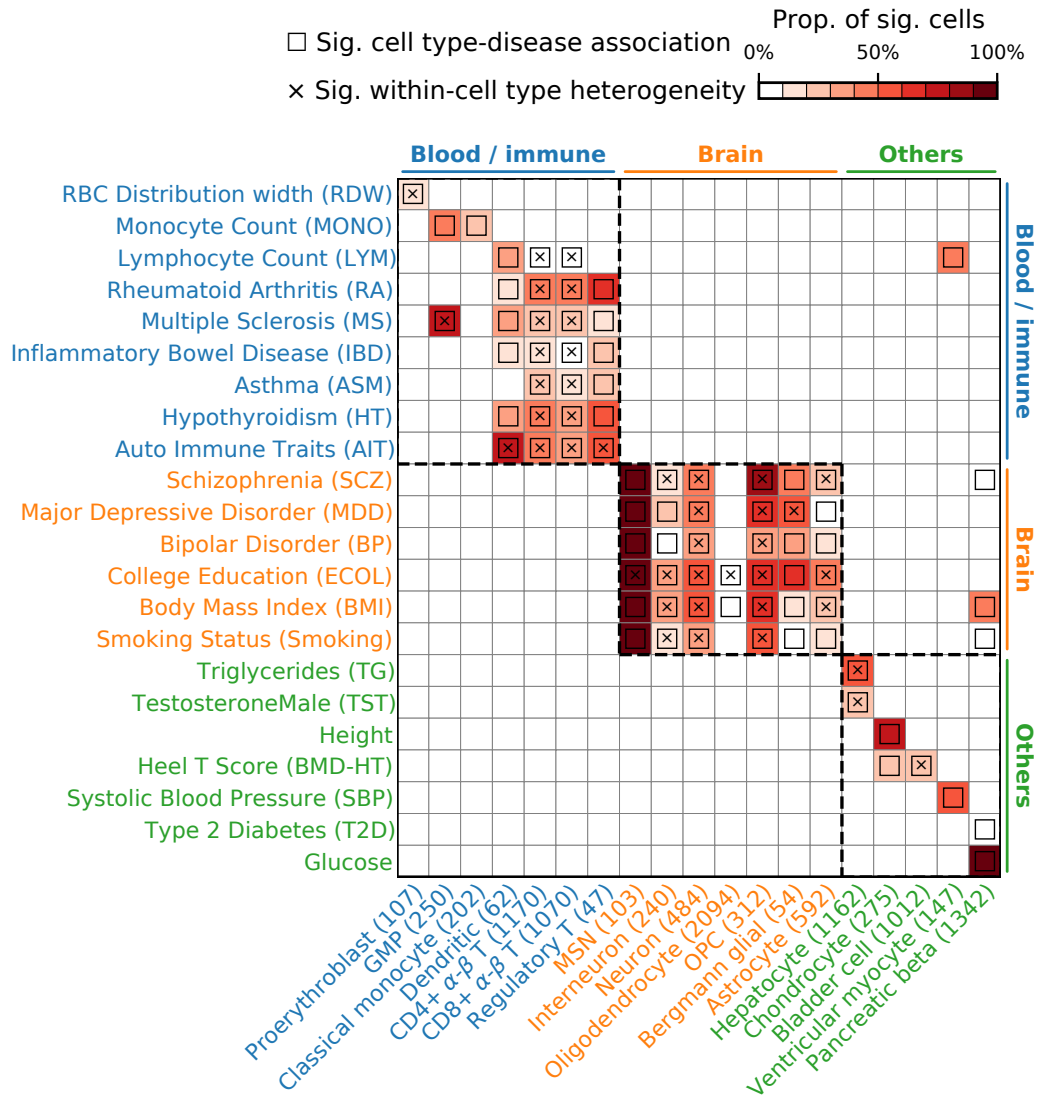

**Figure 3. Disease associations at the cell type-level.** We report  $s_{cDRS}$  results for individual cells aggregated at the cell type-level for a subset of 19 cell types and 22 diseases/traits in the TMS FACS data. Each row represents a disease/trait and each column represents a cell type (with number of cells indicated in parentheses). Heatmap colors for each cell type-disease pair denote the proportion of significantly associated cells (FDR<0.1 across all cells for a given disease). Squares denote significant cell type-disease associations (FDR<0.05 across all pairs of the 120 cell types and 74 diseases/traits; p-values via MC test; Methods). Cross symbols denote significant heterogeneity in association with disease across individual cells within a given cell type (FDR<0.05 across all pairs; p-values via MC test; Methods). Heatmap colors (>10% of cells associated) and cross symbols are omitted for cell type-disease pairs with non-significant cell type-disease associations via MC test (heatmap colors omitted for 1 pair (Dendritic-ASM) and cross symbols omitted for 6 pairs (CD4+  $\alpha$ - $\beta$  T-MONO, CD8+  $\alpha$ - $\beta$  T-MONO, bladder cell-RA, bladder cell-ASM, oligodendrocyte-BP, and dendritic-BMD-HT)). Auto Immune Traits (AIT) represents a collection of diseases in the UK Biobank that characterize autoimmune pathogenic etiology<sup>124, 125</sup>. Abbreviated cell type names include red blood cell (RBC), granulocyte monocyte progenitor (GMP), medium spiny neuron (MSN), and oligodendrocyte precursor cell (OPC). Neuron refers to neuronal cells with undetermined subtypes (whereas MSN and interneuron (non-overlapping with neuron) refer to neuronal cells with those inferred subtypes). Complete results for 120 cell types and 74 diseases/traits are reported in Supp. Fig. 7 and Supp. Table 14.

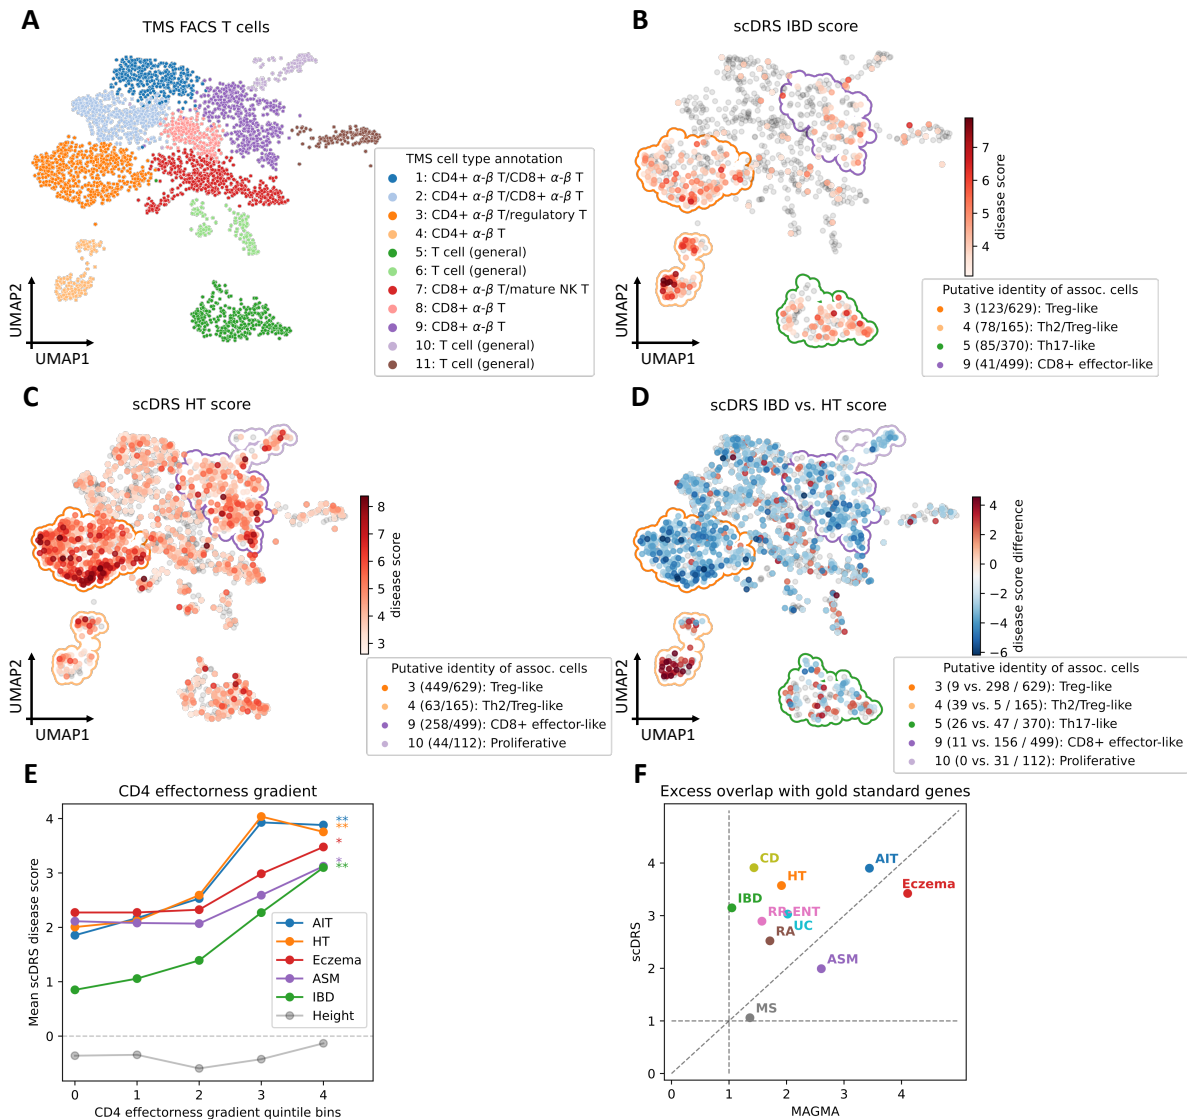

**Figure 4. Associations of T cells with autoimmune diseases.** (A) UMAP visualization of T cells in the TMS FACS data. In the legend, cluster labels are based on annotated TMS cell types in the cluster. Compositions of tissue, sex, and age of cells in each cluster are reported in Supp. Fig. 15. (B-C) Subpopulations of T cells associated with IBD and HT, respectively. Significantly associated cells ( $FDR < 0.1$ ) are denoted in red, with shades of red denoting  $s_{CDRS}$  disease scores; other cells are denoted in grey. Cluster boundaries indicate the corresponding T cell clusters from panel A. In the figure legend, the number of disease-associated cells and total number of cells are provided in parentheses, and cluster labels are based on the putative identities of the associated cells in the cluster, for the top 4 clusters (out of 11) with the strongest level of association (highest average disease score for associated cells in the cluster). Results for the other 8 autoimmune diseases and height are reported in Supp. Fig. 16. (D) Differences in individual cell-level associations between IBD and HT. Differentially associated cells (absolute  $s_{CDRS}$  disease score difference  $> 2$ ) are denoted in red and blue, with shades of colors denoting  $s_{CDRS}$  disease score differences; other cells are denoted in grey. Cluster boundaries indicate the corresponding T cell clusters from panel A. Clusters are annotated as in panels B and C; the number of IBD-enriched cells, HT-enriched cells, and all cells in the cluster are provided in parentheses. Differences in individual cell-level associations between IBD and the other 8 autoimmune diseases are reported in Supp. Fig. 21. (E) Association between  $s_{CDRS}$  disease score and CD4 effectorness gradient across CD4<sup>+</sup> T cells for 5 representative autoimmune diseases and height, a negative control trait. The x-axis denotes CD4 effectorness gradient quintile bins and the y-axis denotes the average  $s_{CDRS}$  disease score in each bin for each disease. \* denotes  $P < 0.05$  and \*\* denotes  $P < 0.005$  (MC test). Numerical results for all 10 autoimmune diseases are reported in Supp. Table 20. (F) Excess overlap of genes prioritized by  $s_{CDRS}$  with gold standard gene sets. The x-axis denotes the excess overlap of genes prioritized by MAGMA and the y-axis denotes the excess overlap of genes prioritize by  $s_{CDRS}$ , for each of 10 autoimmune diseases. The median ratio of (excess overlap - 1) for  $s_{CDRS}$  vs. MAGMA was 2.07. Numerical results are reported in Supp. Table 22.



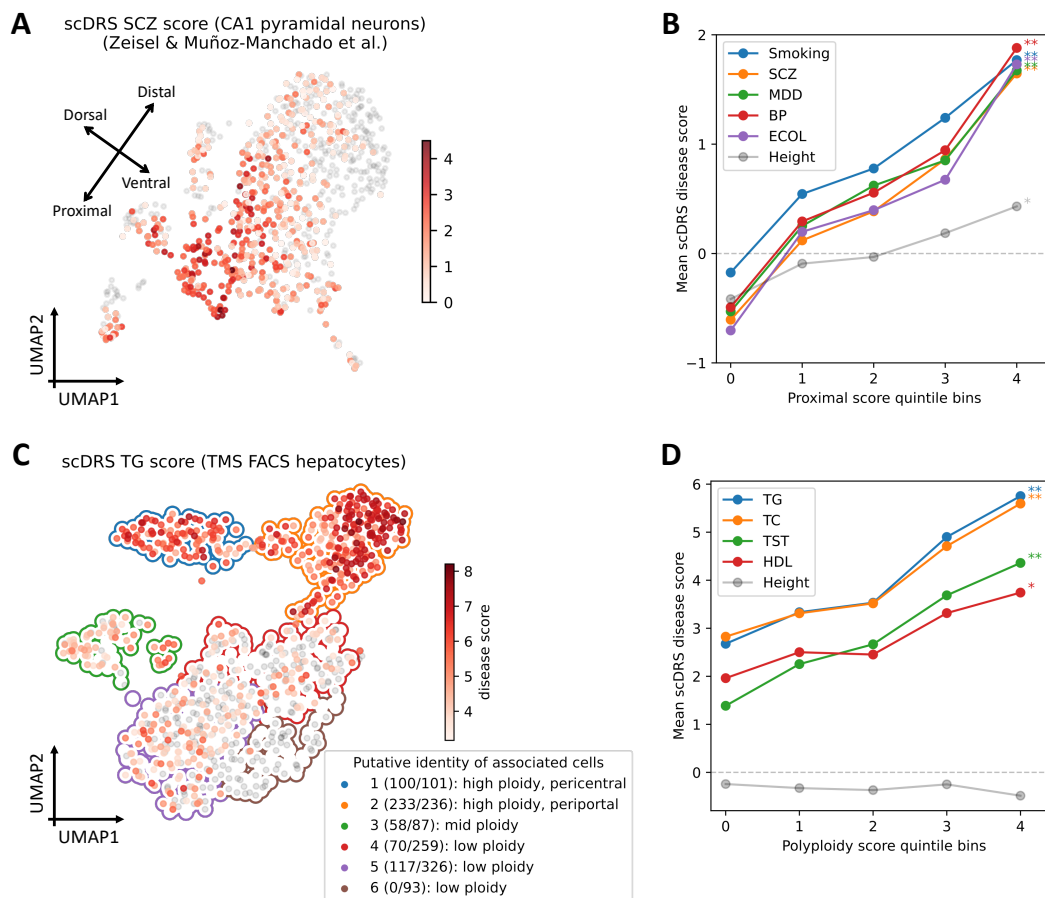

**Figure 5. Associations of neurons with brain-related disease/traits and hepatocytes with metabolic traits. (A)** Subpopulations of CA1 pyramidal neurons associated with SCZ in the Zeisel & Muñoz-Manchado et al. data. Colors of cells denote  $s_{CDRS}$  disease scores (negative disease scores are denoted in grey). We include a visualization of putative dorsal-ventral and proximal-distal axes (see text). Results for all 7 brain-related diseases/traits and height are reported in Supp. Fig. 28B. **(B)** Association between  $s_{CDRS}$  disease score and proximal score across CA1 pyramidal neurons for 5 representative brain-related disease/traits and height, a negative control trait. The x-axis denotes proximal score quintile bins and the y-axis denotes average  $s_{CDRS}$  disease score in each bin for each disease. \* denotes  $P < 0.05$  and \*\* denotes  $P < 0.005$  (MC test). Results for all 6 spatial scores and all 7 brain traits (and height) are reported in Supp. Fig. 30 and Supp. Table 25. **(C)** Subpopulations of hepatocytes associated with TG in the TMS FACS data. Significantly associated cells ( $FDR < 0.1$ ) are denoted in red, with shades of red denoting  $s_{CDRS}$  disease scores; non-significant cells are denoted in grey. Cluster boundaries indicate the corresponding hepatocyte clusters. In the legend, numbers in parentheses denote the number of TG-associated cells vs. the total number of cells and cluster labels are based on the putative identity of cells in the cluster. Results for the other 8 metabolic traits and height are reported in Supp. Fig. 31. **(D)** Association between  $s_{CDRS}$  disease score and polyploidy score for 4 representative metabolic traits and height, a negative control trait. The x-axis denotes polyploidy score quintile bins and the y-axis denotes average  $s_{CDRS}$  disease score in each bin for each disease. \* denotes  $P < 0.05$  and \*\* denotes  $P < 0.005$  (MC test). Results for all 3 scores (polyploidy score, pericentral score, periportal score) and all 9 metabolic traits (and height) are reported in Supp. Fig. 34 and Supp. Table 26.

## References

- 719
- 720 1. Peter M Visscher, Naomi R Wray, Qian Zhang, Pamela Sklar, Mark I McCarthy, Matthew A Brown, and Jian Yang. 10  
721 years of gwas discovery: biology, function, and translation. *The American Journal of Human Genetics*, 101(1):5–22,  
722 2017.
  - 723 2. Melina Claussnitzer, Judy H Cho, Rory Collins, Nancy J Cox, Emmanouil T Dermitzakis, Matthew E Hurles, Sekar  
724 Kathiresan, Eimear E Kenny, Cecilia M Lindgren, Daniel G MacArthur, et al. A brief history of human disease genetics.  
725 *Nature*, 577(7789):179–189, 2020.
  - 726 3. Idan Hekselman and Esti Yeger-Lotem. Mechanisms of tissue and cell-type specificity in heritable traits and diseases.  
727 *Nature Reviews Genetics*, 21(3):137–150, 2020.
  - 728 4. Allon Wagner, Aviv Regev, and Nir Yosef. Revealing the vectors of cellular identity with single-cell genomics. *Nature*  
729 *biotechnology*, 34(11):1145–1160, 2016.
  - 730 5. Aviv Regev, Sarah A Teichmann, Eric S Lander, Ido Amit, Christophe Benoist, Ewan Birney, Bernd Bodenmiller, Peter  
731 Campbell, Piero Carninci, Menna Clatworthy, et al. Science forum: the human cell atlas. *elife*, 6:e27041, 2017.
  - 732 6. Diego Calderon, Anand Bhaskar, David A Knowles, David Golan, Towfique Raj, Audrey Q Fu, and Jonathan K Pritchard.  
733 Inferring relevant cell types for complex traits by using single-cell gene expression. *The American Journal of Human*  
734 *Genetics*, 101(5):686–699, 2017.
  - 735 7. Kyoko Watanabe, Maša Umićević Mirkov, Christiaan A de Leeuw, Martijn P van den Heuvel, and Danielle Posthuma.  
736 Genetic mapping of cell type specificity for complex traits. *Nature communications*, 10(1):1–13, 2019.
  - 737 8. Julien Bryois, Nathan G Skene, Thomas Folkmann Hansen, Lisette JA Kogelman, Hunna J Watson, Zijing Liu, Leo  
738 Brueggeman, Jerome Breen, Cynthia M Bulik, Ernest Arenas, et al. Genetic identification of cell types underlying brain  
739 complex traits yields insights into the etiology of parkinson’s disease. *Nature genetics*, 52(5):482–493, 2020.
  - 740 9. Xinli Hu, Hyun Kim, Eli Stahl, Robert Plenge, Mark Daly, and Soumya Raychaudhuri. Integrating autoimmune risk loci  
741 with gene-expression data identifies specific pathogenic immune cell subsets. *The American Journal of Human Genetics*,  
742 89(4):496–506, 2011.
  - 743 10. Padhraig Gormley, Verner Anttila, Bendik S Winsvold, Priit Palta, Tonu Esko, Tune H Pers, Kai-How Farh, Ester  
744 Cuenca-Leon, Mikko Muona, Nicholas A Furlotte, et al. Meta-analysis of 375,000 individuals identifies 38 susceptibility  
745 loci for migraine. *Nature genetics*, 48(8):856–866, 2016.
  - 746 11. Halit Ongen, Andrew A Brown, Olivier Delaneau, Nikolaos I Panousis, Alexandra C Nica, and Emmanouil T Dermitzakis.  
747 Estimating the causal tissues for complex traits and diseases. *Nature genetics*, 49(12):1676–1683, 2017.
  - 748 12. Hilary K Finucane, Yakir A Reshef, Verner Anttila, Kamil Slowikowski, Alexander Gusev, Andrea Byrnes, Steven  
749 Gazal, Po-Ru Loh, Caleb Lareau, Noam Shores, et al. Heritability enrichment of specifically expressed genes identifies  
750 disease-relevant tissues and cell types. *Nature genetics*, 50(4):621–629, 2018.
  - 751 13. Jean Fan, Neeraj Salathia, Rui Liu, Gwendolyn E Kaeser, Yun C Yung, Joseph L Herman, Fiona Kaper, Jian-Bing Fan,  
752 Kun Zhang, Jerold Chun, et al. Characterizing transcriptional heterogeneity through pathway and gene set overdispersion  
753 analysis. *Nature methods*, 13(3):241–244, 2016.
  - 754 14. Sara Aibar, Carmen Bravo González-Blas, Thomas Moerman, Hana Imrichova, Gert Hulselmans, Florian Rambow,  
755 Jean-Christophe Marine, Pierre Geurts, Jan Aerts, Joost van den Oord, et al. Scenic: single-cell regulatory network  
756 inference and clustering. *Nature methods*, 14(11):1083–1086, 2017.
  - 757 15. Andrew Butler, Paul Hoffman, Peter Smibert, Efthymia Papalexi, and Rahul Satija. Integrating single-cell transcriptomic  
758 data across different conditions, technologies, and species. *Nature biotechnology*, 36(5):411–420, 2018.
  - 759 16. David DeTomaso, Matthew G Jones, Meena Subramaniam, Tal Ashuach, J Ye Chun, and Nir Yosef. Functional  
760 interpretation of single cell similarity maps. *Nature communications*, 10(1):1–11, 2019.
  - 761 17. Mark S Cembrowski and Nelson Spruston. Heterogeneity within classical cell types is the rule: lessons from hippocampal  
762 pyramidal neurons. *Nature Reviews Neuroscience*, 20(4):193–204, 2019.
  - 763 18. Hildreth Robert Frost. Variance-adjusted mahalanobis (vam): a fast and accurate method for cell-specific gene set scoring.  
764 *Nucleic acids research*, 48(16):e94–e94, 2020.
  - 765 19. The Tabula Muris Consortium. A single-cell transcriptomic atlas characterizes ageing tissues in the mouse. *Nature*,  
766 583(7817):590–595, 2020.

- 767 **20.** Christiaan A de Leeuw, Joris M Mooij, Tom Heskes, and Danielle Posthuma. Magma: generalized gene-set analysis of  
768 gwas data. *PLoS Comput Biol*, 11(4):e1004219, 2015.
- 769 **21.** Tim Stuart, Andrew Butler, Paul Hoffman, Christoph Hafemeister, Efthymia Papalexi, William M Mauck III, Yuhao Hao,  
770 Marlon Stoeckius, Peter Smibert, and Rahul Satija. Comprehensive integration of single-cell data. *Cell*, 177(7):1888–1902,  
771 2019.
- 772 **22.** Belinda Phipson and Gordon K Smyth. Permutation p-values should never be zero: calculating exact p-values when  
773 permutations are randomly drawn. *Statistical applications in genetics and molecular biology*, 9(1), 2010.
- 774 **23.** Simone Picelli, Omid R Faridani, Åsa K Björklund, Gösta Winberg, Sven Sagasser, and Rickard Sandberg. Full-length  
775 rna-seq from single cells using smart-seq2. *Nature protocols*, 9(1):171, 2014.
- 776 **24.** Grace XY Zheng, Jessica M Terry, Phillip Belgrader, Paul Ryvkin, Zachary W Bent, Ryan Wilson, Solongo B Ziraldo,  
777 Tobias D Wheeler, Geoff P McDermott, Junjie Zhu, et al. Massively parallel digital transcriptional profiling of single  
778 cells. *Nature communications*, 8(1):1–12, 2017.
- 779 **25.** Stephen R Quake, Tabula Sapiens Consortium, et al. The tabula sapiens: a single cell transcriptomic atlas of multiple  
780 organs from individual human donors. *bioRxiv*, 2021.
- 781 **26.** Nathan G Skene, Julien Bryois, Trygve E Bakken, Gerome Breen, James J Crowley, H el ena A Gaspar, Paola Giusti-  
782 Rodriguez, Rebecca D Hodge, Jeremy A Miller, Ana B Mu oz-Manchado, et al. Genetic identification of brain cell types  
783 underlying schizophrenia. *Nature genetics*, 50(6):825–833, 2018.
- 784 **27.** Peng Huang, Yongzhong Zhao, Jianmei Zhong, Xinhua Zhang, Qifa Liu, Xiaoxia Qiu, Shaoke Chen, Hongxia Yan,  
785 Christopher Hillyer, Narla Mohandas, et al. Putative regulators for the continuum of erythroid differentiation revealed by  
786 single-cell transcriptome of human bm and ucb cells. *Proceedings of the National Academy of Sciences*, 117(23):12868–  
787 12876, 2020.
- 788 **28.** Karthik A Jagadeesh, Kushal K Dey, Daniel T Montoro, Steven Gazal, Jesse M Engreitz, Ramnik J Xavier, Alkes L Price,  
789 and Aviv Regev. Identifying disease-critical cell types and cellular processes across the human body by integration of  
790 single-cell profiles and human genetics. *bioRxiv*, 2021.
- 791 **29.** Noushin Lotfi, Rodolfo Thome, Nahid Rezaei, Guang-Xian Zhang, Abbas Rezaei, Abdolmohamad Rostami, and Nafiseh  
792 Esmail. Roles of gm-csf in the pathogenesis of autoimmune diseases: an update. *Frontiers in immunology*, 10:1265,  
793 2019.
- 794 **30.** Mirre De Bondt, Niels Hellings, Ghislain Opendakker, and Sofie Struyf. Neutrophils: Underestimated players in the  
795 pathogenesis of multiple sclerosis (ms). *International Journal of Molecular Sciences*, 21(12):4558, 2020.
- 796 **31.** Jonathan RI Coleman, H el ena A Gaspar, Julien Bryois, Enda M Byrne, Andreas J Forstner, Peter A Holmans, Christiaan A  
797 de Leeuw, Manuel Mattheisen, Andrew McQuillin, Jennifer M Whitehead Pavlides, et al. The genetics of the mood  
798 disorder spectrum: genome-wide association analyses of more than 185,000 cases and 439,000 controls. *Biological  
799 psychiatry*, 88(2):169–184, 2020.
- 800 **32.** Niamh Mullins, Andreas J Forstner, Kevin S O’Connell, Brandon Coombes, Jonathan RI Coleman, Zhen Qiao, Thomas D  
801 Als, Tim B Bigdeli, Sigrid B orte, Julien Bryois, et al. Genome-wide association study of more than 40,000 bipolar  
802 disorder cases provides new insights into the underlying biology. *Nature genetics*, 53(6):817–829, 2021.
- 803 **33.** Devika Agarwal, Cynthia Sandor, Viola Volpato, Tara M Caffrey, Jimena Monz on-Sandoval, Rory Bowden, Javier  
804 Alegre-Abarrategui, Richard Wade-Martins, and Caleb Webber. A single-cell atlas of the human substantia nigra reveals  
805 cell-specific pathways associated with neurological disorders. *Nature communications*, 11(1):1–11, 2020.
- 806 **34.** Benjamin Eittle, Johannes CM Schlachetzki, and J urgen Winkler. Oligodendroglia and myelin in neurodegenerative  
807 diseases: more than just bystanders? *Molecular neurobiology*, 53(5):3046–3062, 2016.
- 808 **35.** Andrea G Dietz, Steven A Goldman, and Maiken Nedergaard. Glial cells in schizophrenia: a unified hypothesis. *The  
809 Lancet Psychiatry*, 7(3):272–281, 2020.
- 810 **36.** Sonia Olivia Spitzer, Sergey Sitnikov, Yasmine Kamen, Kimberley Anne Evans, Deborah Kronenberg-Versteeg, Sabine  
811 Dietmann, Omar de Faria Jr, Sylvia Agathou, and Ragnhildur Th ora K arad ottir. Oligodendrocyte progenitor cells become  
812 regionally diverse and heterogeneous with age. *Neuron*, 101(3):459–471, 2019.
- 813 **37.** Michele Alves-Bezerra and David E Cohen. Triglyceride metabolism in the liver. *Comprehensive Physiology*, 8(1):1,  
814 2017.

- 815 **38.** Michael Guo, Zun Liu, Jessie Willen, Cameron P Shaw, Daniel Richard, Evelyn Jagoda, Andrew C Doxey, Joel Hirschhorn,  
816 and Terence D Capellini. Epigenetic profiling of growth plate chondrocytes sheds insight into regulatory genetic variation  
817 influencing height. *elife*, 6:e29329, 2017.
- 818 **39.** John P Kemp, John A Morris, Carolina Medina-Gomez, Vincenzo Forgetta, Nicole M Warrington, Scott E Youtlen, Jie  
819 Zheng, Celia L Gregson, Elin Grundberg, Katerina Trajanoska, et al. Identification of 153 new loci associated with heel  
820 bone mineral density and functional involvement of *gpc6* in osteoporosis. *Nature genetics*, 49(10):1468–1475, 2017.
- 821 **40.** Helen R Warren, Evangelos Evangelou, Claudia P Cabrera, He Gao, Meixia Ren, Borbala Mifsud, Ioanna Ntalla, Praveen  
822 Surendran, Chunyu Liu, James P Cook, et al. Genome-wide association analysis identifies novel blood pressure loci and  
823 offers biological insights into cardiovascular risk. *Nature genetics*, 49(3):403–415, 2017.
- 824 **41.** Joshua Chiou, Chun Zeng, Zhang Cheng, Jee Yun Han, Michael Schlichting, Michael Miller, Robert Mendez, Serina  
825 Huang, Jinzhao Wang, Yinghui Sui, et al. Single-cell chromatin accessibility identifies pancreatic islet cell type–and  
826 state-specific regulatory programs of diabetes risk. *Nature Genetics*, 53(4):455–466, 2021.
- 827 **42.** Massimo Andreatta, Jesus Corria-Osorio, Sören Müller, Rafael Cubas, George Coukos, and Santiago J Carmona.  
828 Interpretation of t cell states from single-cell transcriptomics data using reference atlases. *Nature communications*,  
829 12(1):1–19, 2021.
- 830 **43.** Amy Li, Rebecca H Herbst, David Canner, Jason M Schenkel, Olivia C Smith, Jonathan Y Kim, Michelle Hillman, Arjun  
831 Bhutkar, Michael S Cuoco, C Garrett Rappazzo, et al. Il-33 signaling alters regulatory t cell diversity in support of tumor  
832 development. *Cell reports*, 29(10):2998–3008, 2019.
- 833 **44.** Clara Abraham and Judy H. Cho. Inflammatory bowel disease. *New England Journal of Medicine*, 361(21):2066–2078,  
834 2009. PMID: 19923578.
- 835 **45.** Giorgos Bamias and Fabio Cominelli. Role of th2 immunity in intestinal inflammation. *Current opinion in gastroenterol-*  
836 *ogy*, 31(6):471, 2015.
- 837 **46.** Marine Fauny, David Moulin, Ferdinando D’amico, Patrick Netter, Nadine Petitpain, Djesia Arnone, Jean-Yves Jouzeau,  
838 Damien Loeuille, and Laurent Peyrin-Biroulet. Paradoxical gastrointestinal effects of interleukin-17 blockers. *Annals of*  
839 *the rheumatic diseases*, 79(9):1132–1138, 2020.
- 840 **47.** Sara Omenetti and Theresa T Pizarro. The treg/th17 axis: a dynamic balance regulated by the gut microbiome. *Frontiers*  
841 *in immunology*, 6:639, 2015.
- 842 **48.** Mei Lan Chen and Mark S Sundrud. Cytokine networks and t-cell subsets in inflammatory bowel diseases. *Inflammatory*  
843 *bowel diseases*, 22(5):1157–1167, 2016.
- 844 **49.** Tanbeena Imam, Sungtae Park, Mark H Kaplan, and Matthew R Olson. Effector t helper cell subsets in inflammatory  
845 bowel diseases. *Frontiers in immunology*, 9:1212, 2018.
- 846 **50.** Martina Yaneva and Razvigor Darlenski. The link between atopic dermatitis and asthma-immunological imbalance and  
847 beyond. *Asthma Research and Practice*, 7(1):1–8, 2021.
- 848 **51.** Eddie Cano-Gamez, Blagoje Soskic, Theodoros I Roumeliotis, Ernest So, Deborah J Smyth, Marta Baldrighi, David  
849 Willé, Nikolina Nakic, Jorge Esparza-Gordillo, Christopher GC Larminie, et al. Single-cell transcriptomics identifies an  
850 effectorness gradient shaping the response of cd4+ t cells to cytokines. *Nature communications*, 11(1):1–15, 2020.
- 851 **52.** Laleh Haghverdi, Maren Büttner, F Alexander Wolf, Florian Buettner, and Fabian J Theis. Diffusion pseudotime robustly  
852 reconstructs lineage branching. *Nature methods*, 13(10):845–848, 2016.
- 853 **53.** David M Gravano and Katrina K Hoyer. Promotion and prevention of autoimmune disease by cd8+ t cells. *Journal of*  
854 *autoimmunity*, 45:68–79, 2013.
- 855 **54.** Stewart Leung, Xuebin Liu, Lei Fang, Xi Chen, Taylor Guo, and Jingwu Zhang. The cytokine milieu in the interplay of  
856 pathogenic th1/th17 cells and regulatory t cells in autoimmune disease. *Cellular & molecular immunology*, 7(3):182–189,  
857 2010.
- 858 **55.** Maria Gutierrez-Arcelus, Nikola Teslovich, Alex R Mola, Rafael B Polidoro, Aparna Nathan, Hyun Kim, Susan Hannes,  
859 Kamil Slowikowski, Gerald FM Watts, Ilya Korsunsky, et al. Lymphocyte innateness defined by transcriptional states  
860 reflects a balance between proliferation and effector functions. *Nature communications*, 10(1):1–15, 2019.
- 861 **56.** Peter A Szabo, Hanna Mendes Levitin, Michelle Miron, Mark E Snyder, Takashi Senda, Jinzhou Yuan, Yim Ling Cheng,  
862 Erin C Bush, Pranay Dogra, Puspa Thapa, et al. Single-cell transcriptomics of human t cells reveals tissue and activation  
863 signatures in health and disease. *Nature communications*, 10(1):1–16, 2019.



- 864 57. Gautier Koscielny, Peter An, Denise Carvalho-Silva, Jennifer A Cham, Luca Fumis, Rippa Gasparyan, Samiul Hasan,  
865 Nikiforos Karamanis, Michael Maguire, Eliseo Papa, et al. Open targets: a platform for therapeutic target identification  
866 and validation. *Nucleic acids research*, 45(D1):D985–D994, 2017.
- 867 58. Malika Kumar Freund, Kathryn S Burch, Huwenbo Shi, Nicholas Mancuso, Gleb Kichaev, Kristina M Garske, David Z  
868 Pan, Zong Miao, Karen L Mohlke, Markku Laakso, et al. Phenotype-specific enrichment of mendelian disorder genes  
869 near gwas regions across 62 complex traits. *The American Journal of Human Genetics*, 103(4):535–552, 2018.
- 870 59. Luke J O’Connor, Armin P Schoech, Farhad Hormozdiari, Steven Gazal, Nick Patterson, and Alkes L Price. Extreme  
871 polygenicity of complex traits is explained by negative selection. *The American Journal of Human Genetics*, 105(3):456–  
872 476, 2019.
- 873 60. Hailong Zhang, Yajuan Zheng, Youdong Pan, Changdong Lin, Shihui Wang, Zhanjun Yan, Ling Lu, Gaoxiang Ge,  
874 Jinsong Li, Yi Arial Zeng, et al. A mutation that blocks integrin  $\alpha 4 \beta 7$  activation prevents adaptive immune-mediated  
875 colitis without increasing susceptibility to innate colitis. *BMC biology*, 18(1):1–15, 2020.
- 876 61. Cambrian Y Liu.  $\beta 7$  gives tregs a gut area code. *Cellular and molecular gastroenterology and hepatology*, 9(3):543–544,  
877 2020.
- 878 62. Ernest HS Choy, Corinne Miceli-Richard, Miguel A González-Gay, Luigi Sinigaglia, Douglas E Schlichting, Gabriella  
879 Meszaros, Inmaculada de la Torre, and Hendrik Schulze-Koops. The effect of jak1/jak2 inhibition in rheumatoid arthritis:  
880 efficacy and safety of baricitinib. *Clin Exp Rheumatol*, 37(4):694–704, 2019.
- 881 63. Robert Harrington, Shamma Ahmad Al Nokhatha, and Richard Conway. Jak inhibitors in rheumatoid arthritis: an  
882 evidence-based review on the emerging clinical data. *Journal of Inflammation Research*, 13:519, 2020.
- 883 64. Aparna Nathan, Jessica I Beynor, Yuriy Baglaenko, Sara Suliman, Kazuyoshi Ishigaki, Samira Asgari, Chuan-Chin  
884 Huang, Yang Luo, Zibiao Zhang, Kattya Lopez, et al. Multimodally profiling memory t cells from a tuberculosis cohort  
885 identifies cell state associations with demographics, environment and disease. *Nature Immunology*, 22(6):781–793, 2021.
- 886 65. Amit Zeisel, Ana B Muñoz-Manchado, Simone Codeluppi, Peter Lönnerberg, Gioele La Manno, Anna Juréus, Sueli  
887 Marques, Hermany Munguba, Liqun He, Christer Betsholtz, et al. Cell types in the mouse cortex and hippocampus  
888 revealed by single-cell rna-seq. *Science*, 347(6226):1138–1142, 2015.
- 889 66. Nathan G Skene and Seth GN Grant. Identification of vulnerable cell types in major brain disorders using single cell  
890 transcriptomes and expression weighted cell type enrichment. *Frontiers in neuroscience*, 10:16, 2016.
- 891 67. Bryan A Strange, Menno P Witter, Ed S Lein, and Edvard I Moser. Functional organization of the hippocampal  
892 longitudinal axis. *Nature Reviews Neuroscience*, 15(10):655–669, 2014.
- 893 68. Mark S Cembrowski, Julia L Bachman, Lihua Wang, Ken Sugino, Brenda C Shields, and Nelson Spruston. Spatial  
894 gene-expression gradients underlie prominent heterogeneity of ca1 pyramidal neurons. *Neuron*, 89(2):351–368, 2016.
- 895 69. Naomi Habib, Yinqing Li, Matthias Heidenreich, Lukasz Swiech, Inbal Avraham-Davidi, John J Trombetta, Cynthia  
896 Hession, Feng Zhang, and Aviv Regev. Div-seq: Single-nucleus rna-seq reveals dynamics of rare adult newborn neurons.  
897 *Science*, 353(6302):925–928, 2016.
- 898 70. Fatma Ayhan, Ashwinikumar Kulkarni, Stefano Berto, Karthigayini Sivaprakasam, Connor Douglas, Bradley C Lega,  
899 and Genevieve Konopka. Resolving cellular and molecular diversity along the hippocampal anterior-to-posterior axis in  
900 humans. *Neuron*, 2021.
- 901 71. Menno P Witter, Thanh P Doan, Bente Jacobsen, Eirik S Nilssen, and Shinya Ohara. Architecture of the entorhinal cortex  
902 a review of entorhinal anatomy in rodents with some comparative notes. *Frontiers in Systems Neuroscience*, 11:46, 2017.
- 903 72. Espen J Henriksen, Laura L Colgin, Carol A Barnes, Menno P Witter, May-Britt Moser, and Edvard I Moser. Spatial  
904 representation along the proximodistal axis of ca1. *Neuron*, 68(1):127–137, 2010.
- 905 73. Amit Zeisel, Hannah Hochgerner, Peter Lönnerberg, Anna Johnsson, Fatima Memic, Job Van Der Zwan, Martin Häring,  
906 Emelie Braun, Lars E Borm, Gioele La Manno, et al. Molecular architecture of the mouse nervous system. *Cell*,  
907 174(4):999–1014, 2018.
- 908 74. Zizhen Yao, Cindy TJ van Velthoven, Thuc Nghi Nguyen, Jeff Goldy, Adriana E Sedeno-Cortes, Fahimeh Baftizadeh,  
909 Darren Bertagnolli, Tamara Casper, Megan Chiang, Kirsten Crichton, et al. A taxonomy of transcriptomic cell types  
910 across the isocortex and hippocampal formation. *Cell*, 184(12):3222–3241, 2021.
- 911 75. Naomi Habib, Inbal Avraham-Davidi, Anindita Basu, Tyler Burks, Karthik Shekhar, Matan Hofree, Sourav R Choudhury,  
912 François Aguet, Ellen Gelfand, Kristin Ardlie, et al. Massively parallel single-nucleus rna-seq with dronc-seq. *Nature*  
913 *methods*, 14(10):955–958, 2017.

- 914 **76.** Suijuan Zhong, Wenyu Ding, Le Sun, Yufeng Lu, Hao Dong, Xiaoying Fan, Zeyuan Liu, Ruiguo Chen, Shu Zhang, Qiang  
915 Ma, et al. Decoding the development of the human hippocampus. *Nature*, 577(7791):531–536, 2020.
- 916 **77.** Ruth Benavides-Piccione, Mamen Regalado-Reyes, Isabel Fernaud-Espinosa, Asta Kastanauskaite, Silvia Tapia-González,  
917 Gonzalo León-Espinosa, Concepcion Rojo, Ricardo Insausti, Idan Segev, and Javier DeFelipe. Differential structure of  
918 hippocampal cal pyramidal neurons in the human and mouse. *Cerebral Cortex*, 30(2):730–752, 2020.
- 919 **78.** Miri Adler, Yael Korem Kohanim, Avichai Tendler, Avi Mayo, and Uri Alon. Continuum of gene-expression profiles  
920 provides spatial division of labor within a differentiated cell type. *Cell systems*, 8(1):43–52, 2019.
- 921 **79.** Shani Ben-Moshe and Shalev Itzkovitz. Spatial heterogeneity in the mammalian liver. *Nature Reviews Gastroenterology*  
922 *& Hepatology*, 16(7):395–410, 2019.
- 923 **80.** Romain Donne, Maëva Saroul-Aïnama, Pierre Cordier, Séverine Celton-Morizur, and Chantal Desdouets. Polyploidy in  
924 liver development, homeostasis and disease. *Nature Reviews Gastroenterology & Hepatology*, 17(7):391–405, 2020.
- 925 **81.** Teemu P Miettinen, Heli KJ Pessa, Matias J Caldez, Tobias Fuhrer, M Kasim Diril, Uwe Sauer, Philipp Kaldis, and  
926 Mikael Björklund. Identification of transcriptional and metabolic programs related to mammalian cell size. *Current*  
927 *Biology*, 24(6):598–608, 2014.
- 928 **82.** ML Richter, IK Deligiannis, K Yin, A Danese, E Lleshi, P Coupland, Catalina A Vallejos, KP Matchett, NC Henderson,  
929 M Colome-Tatche, et al. Single-nucleus rna-seq2 reveals functional crosstalk between liver zonation and ploidy. *Nature*  
930 *communications*, 12(1):1–16, 2021.
- 931 **83.** Keren Bahar Halpern, Rom Shenhav, Orit Matcovitch-Natan, Beáta Tóth, Doron Lemze, Matan Golan, Efi E Massasa,  
932 Shaked Baydatch, Shanie Landen, Andreas E Moor, et al. Single-cell spatial reconstruction reveals global division of  
933 labour in the mammalian liver. *Nature*, 542(7641):352–356, 2017.
- 934 **84.** Yujie Meng, Junhui Li, Jianju Liu, Haixiao Hu, Wei Li, Wenxin Liu, and Shaojiang Chen. Ploidy effect and genetic  
935 architecture exploration of stalk traits using dh and its corresponding haploid populations in maize. *BMC plant biology*,  
936 16(1):1–15, 2016.
- 937 **85.** Aris Taychameekiatchai and Bruce Wang. Tentative title. *Manuscript in preparation*, 2021.
- 938 **86.** Nadim Aizarani, Antonio Saviano, Laurent Maily, Sarah Durand, Josip S Herman, Patrick Pessaux, Thomas F Baumert,  
939 Dominic Grün, et al. A human liver cell atlas reveals heterogeneity and epithelial progenitors. *Nature*, 572(7768):199–204,  
940 2019.
- 941 **87.** Meromit Singer, Chao Wang, Le Cong, Nemanja D Marjanovic, Monika S Kowalczyk, Huiyuan Zhang, Jackson Nyman,  
942 Kaori Sakuishi, Sema Kurtulus, David Gennert, et al. A distinct gene module for dysfunction uncoupled from activation  
943 in tumor-infiltrating t cells. *Cell*, 166(6):1500–1511, 2016.
- 944 **88.** Sidharth V Puram, Itay Tirosh, Anuraag S Parikh, Anoop P Patel, Keren Yizhak, Shawn Gillespie, Christopher Rodman,  
945 Christina L Luo, Edmund A Mroz, Kevin S Emerick, et al. Single-cell transcriptomic analysis of primary and metastatic  
946 tumor ecosystems in head and neck cancer. *Cell*, 171(7):1611–1624, 2017.
- 947 **89.** François Aguet and Manuel Muñoz Aguirre. Genetic effects on gene expression across human tissues. *Nature*, 550:204–  
948 213, 2017.
- 949 **90.** Elle M Weeks, Jacob C Ulirsch, Nathan Y Cheng, Brian L Trippe, Rebecca S Fine, Jenkai Miao, Tejal A Patwardhan,  
950 Masahiro Kanai, Joseph Nasser, Charles P Fulco, et al. Leveraging polygenic enrichments of gene features to predict  
951 genes underlying complex traits and diseases. *medRxiv*, 2020.
- 952 **91.** Steven Gazal, Omer Weissbrod, Farhad Hormozdiari, Kushal Dey, Joseph Nasser, Karthik Jagadeesh, Daniel Weiner,  
953 Huwenbo Shi, Charles Fulco, Luke O’Connor, et al. Combining snp-to-gene linking strategies to pinpoint disease genes  
954 and assess disease omnigenicity. *medRxiv*, 2021.
- 955 **92.** Genomes Project Consortium, A Auton, LD Brooks, RM Durbin, EP Garrison, and HM Kang. A global reference for  
956 human genetic variation. *Nature*, 526(7571):68–74, 2015.
- 957 **93.** Robert C Geary. The contiguity ratio and statistical mapping. *The incorporated statistician*, 5(3):115–146, 1954.
- 958 **94.** F Alexander Wolf, Philipp Angerer, and Fabian J Theis. Scanpy: large-scale single-cell gene expression data analysis.  
959 *Genome biology*, 19(1):1–5, 2018.
- 960 **95.** Yoav Benjamini and Yosef Hochberg. Controlling the false discovery rate: a practical and powerful approach to multiple  
961 testing. *Journal of the Royal statistical society: series B (Methodological)*, 57(1):289–300, 1995.

- 962 **96.** Clare Bycroft, Colin Freeman, Desislava Petkova, Gavin Band, Lloyd T Elliott, Kevin Sharp, Allan Motyer, Damjan  
963 Vukcevic, Olivier Delaneau, Jared O’Connell, et al. The uk biobank resource with deep phenotyping and genomic data.  
964 *Nature*, 562(7726):203–209, 2018.
- 965 **97.** Katrina M De Lange, Loukas Moutsianas, James C Lee, Christopher A Lamb, Yang Luo, Nicholas A Kennedy, Luke  
966 Jostins, Daniel L Rice, Javier Gutierrez-Achury, Sun-Gou Ji, et al. Genome-wide association study implicates immune  
967 activation of multiple integrin genes in inflammatory bowel disease. *Nature genetics*, 49(2):256–261, 2017.
- 968 **98.** Patrick CA Dubois, Gosia Trynka, Lude Franke, Karen A Hunt, Jihane Romanos, Alessandra Curtotti, Alexandra  
969 Zhernakova, Graham AR Heap, Róza Ádány, Arpo Aromaa, et al. Multiple common variants for celiac disease influencing  
970 immune gene expression. *Nature genetics*, 42(4):295–302, 2010.
- 971 **99.** James Bentham, David L Morris, Deborah S Cunninghame Graham, Christopher L Pinder, Philip Tomblason, Timothy W  
972 Behrens, Javier Martín, Benjamin P Fairfax, Julian C Knight, Lingyan Chen, et al. Genetic association analyses implicate  
973 aberrant regulation of innate and adaptive immunity genes in the pathogenesis of systemic lupus erythematosus. *Nature*  
974 *genetics*, 47(12):1457–1464, 2015.
- 975 **100.** Farren Briggs, Xiaorong Shao, Benjamin A Goldstein, Jorge R Oksenberg, Lisa F Barcellos, and Philip L De Jager.  
976 Genome-wide association study of severity in multiple sclerosis. *Genes & Immunity*, 12(8), 2011.
- 977 **101.** Heather J Cordell, Younghun Han, George F Mells, Yafang Li, Gideon M Hirschfield, Casey S Greene, Gang Xie, Brian D  
978 Juran, Dakai Zhu, David C Qian, et al. International genome-wide meta-analysis identifies new primary biliary cirrhosis  
979 risk loci and targetable pathogenic pathways. *Nature communications*, 6(1):1–11, 2015.
- 980 **102.** Yukinori Okada, Di Wu, Gosia Trynka, Towfique Raj, Chikashi Terao, Katsunori Ikari, Yuta Kochi, Koichiro Ohmura,  
981 Akari Suzuki, Shinji Yoshida, et al. Genetics of rheumatoid arthritis contributes to biology and drug discovery. *Nature*,  
982 506(7488):376–381, 2014.
- 983 **103.** Ditte Demontis, Raymond K Walters, Joanna Martin, Manuel Mattheisen, Thomas D Als, Esben Agerbo, Gísli Baldursson,  
984 Rich Belliveau, Jonas Bybjerg-Grauholm, Marie Bækvad-Hansen, et al. Discovery of the first genome-wide significant  
985 risk loci for attention deficit/hyperactivity disorder. *Nature genetics*, 51(1):63–75, 2019.
- 986 **104.** Iris E Jansen, Jeanne E Savage, Kyoko Watanabe, Julien Bryois, Dylan M Williams, Stacy Steinberg, Julia Sealock, Ida K  
987 Karlsson, Sara Hägg, Lavinia Athanasiu, et al. Genome-wide meta-analysis identifies new loci and functional pathways  
988 influencing alzheimer’s disease risk. *Nature genetics*, 51(3):404–413, 2019.
- 989 **105.** Mengzhen Liu, Yu Jiang, Robbee Wedow, Yue Li, David M Brazel, Fang Chen, Gargi Datta, Jose Davila-Velderrain,  
990 Daniel McGuire, Chao Tian, et al. Association studies of up to 1.2 million individuals yield new insights into the genetic  
991 etiology of tobacco and alcohol use. *Nature genetics*, 51(2):237–244, 2019.
- 992 **106.** Richard Karlsson Linnér, Pietro Biroli, Edward Kong, S Fleur W Meddens, Robbee Wedow, Mark Alan Fontana, Maël  
993 Lebreton, Stephen P Tino, Abdel Abdellaoui, Anke R Hammerschlag, et al. Genome-wide association analyses of risk  
994 tolerance and risky behaviors in over 1 million individuals identify hundreds of loci and shared genetic influences. *Nature*  
995 *genetics*, 51(2):245–257, 2019.
- 996 **107.** Jeanne E Savage, Philip R Jansen, Sven Stringer, Kyoko Watanabe, Julien Bryois, Christiaan A De Leeuw, Mats  
997 Nagel, Swapnil Awasthi, Peter B Barr, Jonathan RI Coleman, et al. Genome-wide association meta-analysis in 269,867  
998 individuals identifies new genetic and functional links to intelligence. *Nature genetics*, 50(7):912–919, 2018.
- 999 **108.** David M Howard, Mark J Adams, Toni-Kim Clarke, Jonathan D Hafferty, Jude Gibson, Masoud Shirali, Jonathan RI  
1000 Coleman, Saskia P Hagenaars, Joey Ward, Eleanor M Wigmore, et al. Genome-wide meta-analysis of depression  
1001 identifies 102 independent variants and highlights the importance of the prefrontal brain regions. *Nature neuroscience*,  
1002 22(3):343–352, 2019.
- 1003 **109.** Gail Davies, Max Lam, Sarah E Harris, Joey W Trampush, Michelle Luciano, W David Hill, Saskia P Hagenaars, Stuart J  
1004 Ritchie, Riccardo E Marioni, Chloe Fawns-Ritchie, et al. Study of 300,486 individuals identifies 148 independent genetic  
1005 loci influencing general cognitive function. *Nature communications*, 9(1):1–16, 2018.
- 1006 **110.** Aysu Okbay, Bart ML Baselmans, Jan-Emmanuel De Neve, Patrick Turley, Michel G Nivard, Mark Alan Fontana,  
1007 S Fleur W Meddens, Richard Karlsson Linnér, Cornelius A Rietveld, Jaime Derringer, et al. Genetic variants associated  
1008 with subjective well-being, depressive symptoms, and neuroticism identified through genome-wide analyses. *Nature*  
1009 *genetics*, 48(6):624–633, 2016.
- 1010 **111.** Douglas M Ruderfer, Stephan Ripke, Andrew McQuillin, James Boocock, Eli A Stahl, Jennifer M Whitehead Pavlides,  
1011 Niamh Mullins, Alexander W Charney, Anil PS Ori, Loes M Olde Loohuis, et al. Genomic dissection of bipolar disorder  
1012 and schizophrenia, including 28 subphenotypes. *Cell*, 173(7):1705–1715, 2018.

- 1013 **112.** Hassan S Dashti, Samuel E Jones, Andrew R Wood, Jacqueline M Lane, Vincent T Van Hees, Heming Wang, Jessica A  
1014 Rhodes, Yanwei Song, Krupal Patel, Simon G Anderson, et al. Genome-wide association study identifies genetic loci for  
1015 self-reported habitual sleep duration supported by accelerometer-derived estimates. *Nature communications*, 10(1):1–12,  
1016 2019.
- 1017 **113.** Mats Nagel, Philip R Jansen, Sven Stringer, Kyoko Watanabe, Christiaan A De Leeuw, Julien Bryois, Jeanne E Savage,  
1018 Anke R Hammerschlag, Nathan G Skene, Ana B Muñoz-Manchado, et al. Meta-analysis of genome-wide association  
1019 studies for neuroticism in 449,484 individuals identifies novel genetic loci and pathways. *Nature genetics*, 50(7):920–927,  
1020 2018.
- 1021 **114.** Jonas B Nielsen, Lars G Fritsche, Wei Zhou, Tanya M Teslovich, Oddgeir L Holmen, Stefan Gustafsson, Maiken E  
1022 Gabrielsen, Ellen M Schmidt, Robin Beaumont, Brooke N Wolford, et al. Genome-wide study of atrial fibrillation  
1023 identifies seven risk loci and highlights biological pathways and regulatory elements involved in cardiac development.  
1024 *The American Journal of Human Genetics*, 102(1):103–115, 2018.
- 1025 **115.** Heribert Schunkert, Inke R König, Sekar Kathiresan, Muredach P Reilly, Themistocles L Assimes, Hilma Holm, Michael  
1026 Preuss, Alexandre FR Stewart, Maja Barbalic, Christian Gieger, et al. Large-scale association analysis identifies 13 new  
1027 susceptibility loci for coronary artery disease. *Nature genetics*, 43(4):333–338, 2011.
- 1028 **116.** Alisa K Manning, Marie-France Hivert, Robert A Scott, Jonna L Grimsby, Nabila Bouatia-Naji, Han Chen, Denis Rybin,  
1029 Ching-Ti Liu, Lawrence F Bielak, Inga Prokopenko, et al. A genome-wide approach accounting for body mass index  
1030 identifies genetic variants influencing fasting glycemic traits and insulin resistance. *Nature genetics*, 44(6):659–669, 2012.
- 1031 **117.** Jonathan P Bradfield, Hui-Qi Qu, Kai Wang, Haitao Zhang, Patrick M Sleiman, Cecilia E Kim, Frank D Mentch, Haijun  
1032 Qiu, Joseph T Glessner, Kelly A Thomas, et al. A genome-wide meta-analysis of six type 1 diabetes cohorts identifies  
1033 multiple associated loci. *PLoS genetics*, 7(9):e1002293, 2011.
- 1034 **118.** Andrew P Morris, Benjamin F Voight, Tanya M Teslovich, Teresa Ferreira, Ayellet V Segre, Valgerdur Steinthorsdottir,  
1035 Rona J Strawbridge, Hassan Khan, Harald Grallert, Anubha Mahajan, et al. Large-scale association analysis provides  
1036 insights into the genetic architecture and pathophysiology of type 2 diabetes. *Nature genetics*, 44(9):981, 2012.
- 1037 **119.** Hilary K Finucane, Brendan Bulik-Sullivan, Alexander Gusev, Gosia Trynka, Yakir Reshef, Po-Ru Loh, Verneri Anttila,  
1038 Han Xu, Chongzhi Zang, Kyle Farh, et al. Partitioning heritability by functional annotation using genome-wide association  
1039 summary statistics. *Nature genetics*, 47(11):1228–1235, 2015.
- 1040 **120.** Ilya Korsunsky, Nghia Millard, Jean Fan, Kamil Slowikowski, Fan Zhang, Kevin Wei, Yuriy Baglaenko, Michael Brenner,  
1041 Po-ru Loh, and Soumya Raychaudhuri. Fast, sensitive and accurate integration of single-cell data with harmony. *Nature*  
1042 *methods*, 16(12):1289–1296, 2019.
- 1043 **121.** Vincent A Traag, Ludo Waltman, and Nees Jan Van Eck. From louvain to leiden: guaranteeing well-connected  
1044 communities. *Scientific reports*, 9(1):1–12, 2019.
- 1045 **122.** Aravind Subramanian, Pablo Tamayo, Vamsi K Mootha, Sayan Mukherjee, Benjamin L Ebert, Michael A Gillette,  
1046 Amanda Paulovich, Scott L Pomeroy, Todd R Golub, Eric S Lander, et al. Gene set enrichment analysis: a knowledge-  
1047 based approach for interpreting genome-wide expression profiles. *Proceedings of the National Academy of Sciences*,  
1048 102(43):15545–15550, 2005.
- 1049 **123.** Arthur Liberzon, Aravind Subramanian, Reid Pinchback, Helga Thorvaldsdóttir, Pablo Tamayo, and Jill P Mesirov.  
1050 Molecular signatures database (msigdb) 3.0. *Bioinformatics*, 27(12):1739–1740, 2011.
- 1051 **124.** Farhad Hormozdiari, Steven Gazal, Bryce Van De Geijn, Hilary K Finucane, Chelsea J-T Ju, Po-Ru Loh, Armin Schoech,  
1052 Yakir Reshef, Xuanyao Liu, Luke O’connor, et al. Leveraging molecular quantitative trait loci to understand the genetic  
1053 architecture of diseases and complex traits. *Nature genetics*, 50(7):1041–1047, 2018.
- 1054 **125.** Steven Gazal, Po-Ru Loh, Hilary K Finucane, Andrea Ganna, Armin Schoech, Shamil Sunyaev, and Alkes L Price.  
1055 Functional architecture of low-frequency variants highlights strength of negative selection across coding and non-coding  
1056 annotations. *Nature genetics*, 50(11):1600–1607, 2018.
